# A Systematic Review on the Effects of Exercise on Gut Microbial Diversity, Taxonomic Composition, and Microbial Metabolites: Identifying Research Gaps and Future Directions

1 **John M.A. Cullen<sup>1</sup>, Shahim Shahzad<sup>1</sup>, Jaapna Dhillon<sup>1\*</sup>**

2 1. Department of Nutrition and Exercise Physiology, University of Missouri-Columbia,  
3 Columbia, MO 65211

4  
5 **\* Correspondence:**

6 Jaapna Dhillon, PhD

7 [jdhillon@missouri.edu](mailto:jdhillon@missouri.edu)

8  
9 **Keywords: microbiome, SCFA, aerobic, resistance training, HIIT, metabolic health**

## 10 **Abstract**

11  
12 The gut microbiome, hosting a diverse microbial community, plays a pivotal role in metabolism,  
13 immunity, and digestion. While the potential of exercise to influence this microbiome has been  
14 increasingly recognized, findings remain incongruous. This systematic review examined the  
15 effects of exercise on the gut microbiome of human and animal models. Databases (i.e., PubMed,  
16 Cochrane Library, Scopus, and Web of Science) were searched up to June 2022. Thirty-two  
17 exercise studies, i.e., 19 human studies, and 13 animal studies with a minimum of two groups  
18 that discussed microbiome outcomes, such as diversity, taxonomic composition, or microbial  
19 metabolites, over the intervention period, were included in the systematic review (PROSPERO  
20 registration numbers: CRD42023394223 and CRD42023394485). Results indicated that over  
21 50% of studies found no significant exercise effect on human microbial diversity. When evident,  
22 exercise often augmented the Shannon index, reflecting enhanced microbial richness and  
23 evenness, irrespective of disease status. Changes in beta-diversity metrics were also documented  
24 with exercise but without clear directionality. A larger percentage of animal studies  
25 demonstrated shifts in diversity compared to human studies, but without any distinct patterns,  
26 mainly due to the varied effects of predominantly aerobic exercise on diversity metrics. In terms  
27 of taxonomic composition, in humans, exercise usually led to a decrease in the  
28 Firmicutes/Bacteroidetes ratio, and consistent increases with *Bacteroides* and *Roseburia* genera.  
29 In animal models, *Coprococcus*, a SCFA producer, consistently rose with exercise. Generally,  
30 SCFA producers were found to increase with exercise in animal models. With regard to  
31 metabolites, SCFAs emerged as the most frequently measured metabolite. However, due to  
32 limited human and animal studies examining exercise effects on microbial-produced metabolites,  
33 including SCFAs, clear patterns did not emerge. The overall risk of bias was deemed neutral. In  
34 conclusion, this comprehensive systematic review underscores that exercise can potentially  
35 impact the gut microbiome with indications of changes in taxonomic composition. The  
36 significant variability in study designs and intervention protocols demands more standardized  
37 methodologies and robust statistical models. A nuanced understanding of the exercise-  
38 microbiome relationship could guide individualized exercise programs to optimize health.

## 39 40 41 **1. Introduction**

42 The gut microbiome is a complex and diverse ecosystem of microorganisms that plays a vital  
43 role in various physiological processes, including digestion, immunity, and metabolism. In recent  
44 years, the potential of exercise to modulate the gut microbiome has gained considerable  
45 attention, and numerous studies have investigated the effects of exercise on the gut microbiome  
46 in both human and animal models.

47 The first indications that exercise has a role in modulating the human gut microbiome and  
48 metabolic capacity of the microbiota were observed through cross-sectional studies (Mailing et  
49 al., 2019). For example, professional rugby players were found to have greater alpha diversity  
50 (Clarke et al., 2014), and amino acid, carbohydrate metabolic pathways, and greater fecal SCFAs  
51 (Barton et al., 2018) than sedentary individuals. Moreover, even in the non-athletic populations,  
52 women who exercised for at least three hours per wk had increased levels of butyrate producers  
53 such as *Faecalibacterium prausnitzii*, *Roseburia hominis*, and mucin degrader, *Akkermansia*  
54 *muciniphila*. However, the cross-sectional nature of these studies limits the ability of these  
55 studies to control diet and other confounding factors on the microbiome (Mailing et al., 2019).

56 The mechanisms by which exercise can impact the gut microbiome are not yet fully understood,  
57 but several potential mechanisms have been proposed (Mailing et al., 2019). The gut-associated  
58 lymphoid tissue (GALT) houses a majority of our immune cells, and exercise can modulate their  
59 gene expression, favoring anti-inflammatory and antioxidant profiles (Hoffman-Goetz et al.,  
60 2009, 2010; Packer and Hoffman-Goetz, 2012), potentially mediating microbial host-microbial  
61 interactions (Ismail et al., 2011; Mailing et al., 2019). Exercise can also influence the gut's  
62 mucus layer, a critical barrier between microbes and the gut lining; as well as gut motility which  
63 can alter GI transit time, potentially impacting microbial habitats and their nutrient availability  
64 (Mailing et al., 2019). Furthermore, exercise can modify the circulation of bile acids (Meissner et  
65 al., 2011), known regulators of the microbial community structure (Kakiyama et al., 2013;  
66 Mailing et al., 2019). Finally, the metabolic demands of exercise release various compounds like  
67 lactate and myokines (Egan and Zierath, 2013) that might directly or indirectly interact with the  
68 gut environment (Mailing et al., 2019) potentially influencing the microbiome. Overall, the  
69 impact of exercise on the gut microbiome is likely mediated by a combination of these  
70 mechanisms. However, the magnitude and consistency of these effects are still unclear, and there  
71 is significant variation in study designs, including differences in exercise types, durations,  
72 intensities, and populations studied, as well as confounding effects of uncontrolled dietary and  
73 environmental factors.

74 To address these issues, this systematic review aims to synthesize the available data on the  
75 effects of exercise on gut microbiome in humans and animal models. The study of the impact of  
76 exercise on the animal microbiome is important because it can provide valuable mechanistic  
77 insights into the complex interactions between host physiology, behavior, and the gut microbiota.  
78 Additionally, animal models allow for greater experimental control of variables such as diet and  
79 genetics, which can be difficult to control in human studies. More specifically, the systematic  
80 review examines the impact of exercise type, duration, and intensity on changes in gut  
81 microbiome outcomes such as microbial phyla and genera composition, alpha- and beta-  
82 diversity, and microbial-produced metabolites such as SCFAs etc., in trials with 2 or more arms,  
83 in both human and animal models. The results of this review will provide a better understanding  
84 of the relationship between exercise and the gut microbiome, potentially identifying targets for  
85 interventions to improve gut and metabolic health.

86

## 87 **2. Methods**

88 The study protocols for the human and animal reviews are registered with PROSPERO, the  
89 International Prospective Register of Systematic Reviews (CRD42023394223 and  
90 CRD42023394485)

### 91 **Search Strategy**

92 A search strategy was designed based on guidelines in the Cochrane Handbook of systematic  
93 reviews (Cochrane Handbook for Systematic Reviews of Interventions, n.d.). Specific terms and  
94 language were utilized to classify and analyze studies that included exercise and assessment of  
95 the gut microbiome. Search strategies are listed in **Supplemental Table 1**. Primary searches  
96 were conducted until October 29, 2021, and were then updated from October 2021 to June 1,  
97 2022 to obtain studies that were published in the interim. There are no restrictions on language,  
98 study design, or date of publication.

### 99 **Study Selection**

100 The study search was performed across 4 databases, PubMed, Web of Science, Scopus, and  
101 Cochrane. Results were then collected in Zotero (version 5.0.87). To determine inclusion of  
102 studies in the review, three authors, (JD, JC, SS) reviewed the articles in a methodical manner.  
103 Any disparities were decided through an inclusion vote.

104 In the first pass, titles were independently screened to identify relevant articles based on specific  
105 criteria. Articles were excluded if the studies were 1) duplicates, 2) reviews, perspectives, or  
106 protocol papers, 3) published as conference abstracts, 4) not related to either exercise or the gut  
107 microbiome, or 5) were in children or pregnant populations. In the second pass, abstracts were  
108 screened for the same criteria in the first pass with additional criteria to exclude studies that were  
109 1) either observational or cross-sectional, 2) not exercise interventions, and 3) did not have full  
110 texts. In the third pass, full texts were screened for the same criteria in the first two passes with  
111 additional criteria to exclude studies that 1) did not include comparator groups, 2) collected gut  
112 microbiome data at one time point, 3) studies where exercise interventions were not clearly  
113 defined. Lastly, articles were categorized based on human studies and animal studies (mouse, rat,  
114 and horse).

### 115 **Data Extraction**

116 Data collection tables were developed and finalized by 3 authors (JD, JC, SS). Extraction of data  
117 was performed by 2 authors (JC, SS) and was reviewed for accuracy by JD. Study quality was  
118 evaluated using the Oxford Centre for Evidence-Based Medicine Levels of Evidence (Oxford  
119 Centre for Evidence-Based Medicine: Levels of Evidence (March 2009) — Centre for Evidence-  
120 Based Medicine (CEBM), University of Oxford, n.d.). The risk of bias analysis was conducted  
121 using the quality control checklists of the Academy of Nutrition and Dietetics (Academy of  
122 Nutrition and Dietetics, n.d.).

123

## 124 **3. Results**

125 In total, 4731 records were screened for inclusion from database searches and 35 from meta-  
126 analyses and systematic reviews and manual search of reference lists. A total of 4608 records  
127 were excluded based on the established criteria (**Figure 1**). Thirty-two studies, i.e., 19 human

128 studies, and 13 animal studies with 2 or more groups that discussed microbiome outcomes, such  
129 as diversity, taxonomic composition, or microbial metabolites, over the intervention period, were  
130 included in the systematic review. The detailed inclusion and exclusion criteria are presented in  
131 **Figure 1**. The breakdown of outcomes by exercise intervention type is depicted in **Figure 2**.

### 132 *Intervention type, study design, duration, and population profiles*

133 Nineteen studies conducted in humans met our inclusion criteria. Of those, 11 included aerobic  
134 training interventions (Taniguchi et al., 2018; Morita et al., 2019; Resende et al., 2021;  
135 Moitinho-Silva et al., 2021; Mahdieh et al., n.d.; Cheng et al., 2012; Sun et al., 2019; Calabrese  
136 et al., 2022; Motiani et al., 2020; Kern et al., 2020; Warbeck et al., 2021), 2 included resistance  
137 training interventions (Morita et al., 2019; Moitinho-Silva et al., 2021) and 9 included combined  
138 aerobic and resistance training interventions (Cronin et al., 2018a, 2019; Liu et al., 2020;  
139 Mokhtarzade et al., 2021; Zhong et al., 2021; Calabrese et al., 2022; Dupuit et al., 2022; Torquati  
140 et al., 2022; Wei et al., 2022). Six studies included a high intensity interval training intervention  
141 (Liu et al., 2020; Motiani et al., 2020; Warbeck et al., 2021; Dupuit et al., 2022; Sun et al., 2022;  
142 Torquati et al., 2022) Included studies varied in design, duration, and populations studied (**Table**  
143 **1**). Seventeen studies were trials with a parallel design (2–6 arms) (Cronin et al., 2018a; Morita  
144 et al., 2019; Kern et al., 2020; Liu et al., 2020; Motiani et al., 2020; Moitinho-Silva et al., 2021;  
145 Mokhtarzade et al., 2021; Resende et al., 2021; Warbeck et al., 2021; Zhong et al., 2021;  
146 Calabrese et al., 2022; Cheng et al., 2022; Dupuit et al., 2022; Sun et al., 2022; Torquati et al.,  
147 2022; Wei et al., 2022; Mahdieh et al., n.d.), of which the longest trial had a duration of 12 mon  
148 (Wei et al., 2022) and the shortest trials had a duration of 2 wk (Motiani et al., 2020). One study  
149 followed a crossover design in which participants were exposed to a 5 wk exercise intervention  
150 and a 5 wk control (Taniguchi et al., 2018). Another study was an 8-wk RCT with a 2- arm  
151 parallel design with a partial crossover (Cronin et al., 2019). The studies involve a diverse range  
152 of participant profiles, including individuals with prediabetes or type 2 diabetes, older males and  
153 females, individuals with normal blood pressure and non-diabetic status, those with  
154 inflammatory bowel disease (IBD), multiple sclerosis (MS), nonalcoholic fatty liver disease  
155 (NAFLD), and celiac disease, as well as individuals with overweight and obesity (**Table 1**).

156 Thirteen studies conducted in various animal models met the inclusion criteria for this review  
157 (**Table 2**). Of these 13, 5 were conducted in mice (Lamoureux et al., 2017; Houghton et al.,  
158 2018; Ribeiro et al., 2019; Chen et al., 2021; Yang et al., 2021a), 4 were in rats (Mika et al.,  
159 2015; Giacco et al., 2020; Meng et al., 2020; Castro et al., 2021), and 4 in horses (De Almeida et  
160 al., 2016; Janabis et al., 2016; Janabi et al., 2017; Walshe et al., 2021). All but one (Castro et al.,  
161 2021) of these studies examined the effects of either aerobic exercise or interventions with  
162 aerobic exercise as an important component. Twelve studies were trials with a parallel design (2–  
163 8 arms) (Mika et al., 2015; De Almeida et al., 2016; Janabis et al., 2016; Lamoureux et al., 2017;  
164 Houghton et al., 2018; Ribeiro et al., 2019; Giacco et al., 2020; Meng et al., 2020; Castro et al.,  
165 2021; Chen et al., 2021; Walshe et al., 2021; Yang et al., 2021b), of which the longest trial had a  
166 duration of 7 mon (Houghton et al., 2018) and the shortest trials had a duration of 3 days (Giacco  
167 et al., 2020). One study followed a crossover design in which horses were exposed to a graded  
168 exercise test and a standing control (Janabi et al., 2017). Most mice studies comprised of male  
169 and female C57BL/6 mice aged between 3-10 wk. Rats used in the studies were male Wistar rats  
170 aged between 6-13 wk (Giacco et al., 2020; Castro et al., 2021), Sprague Dawley rats with  
171 obesity aged 16 wk (Meng et al., 2020), and adult male Fischer F344 rats (Mika et al., 2015).

172 Standardbred horses, including mares and geldings, aged 3-17 yr old were the most common  
173 horse breed used in the studies.

#### 174 *Effects of exercise interventions on microbial diversity*

##### 175 *Human studies*

176 Sixteen intervention studies in humans examined microbial diversity outcomes. In a sedentary  
177 but healthy population of males and females, 10 wk of aerobic training 3 times a wk, but not  
178 resistance training decreased Chao1 index (Moitinho-Silva et al., 2021). In a similar population,  
179 six months of moderate and vigorous intensities of leisure time exercise and cycling 5x/wk  
180 resulted in a greater shift in Bray-Curtis dissimilarity compared to the non-active control (Kern et  
181 al., 2020). Additionally, the cycling group showed a greater change in weighted unifracs diversity  
182 while the vigorous intensity group showed an increase in Shannon's index after 3 months (Kern  
183 et al., 2020).

184 Two studies incorporated exercise with dietary interventions. In one study, combined aerobic and  
185 resistance training 3 times a wk for 8 wk along with 24 g protein consumption decreased archeal  
186 Shannon's index but increased bacterial Shannon's index when compared to the protein only  
187 group, and in comparison to the exercise only group, decreased viral Shannon's index (Cronin et  
188 al., 2018a). All three groups showed separation in species Bray-Curtis dissimilarity after the 8  
189 wk intervention (Cronin et al., 2018a). In the other study, a one-year lifestyle intervention  
190 resulted in an increase in overall richness and Shannon's index in individuals with type 2  
191 diabetes which was not different from the standard care control (Wei et al., 2022). The only  
192 changes unique to the lifestyle intervention groups were observed differences in weighted unifracs  
193 measures at 3 months, however this difference between groups was not maintained throughout  
194 the whole intervention (Wei et al., 2022).

195 In a similar population with diabetes, moderate-intensity continuous training vs. high-intensity  
196 exercise interval training (combined aerobic and resistance) resulted in differential effects on  
197 Euclidean diversity between the two groups after 8 wk of training (Torquati et al., 2022). In  
198 postmenopausal females with overweight and obesity, concurrent HIIT and resistance training  
199 for 12 wk resulted in greater change of unweighted unifracs diversity compared to the control  
200 (Dupuit et al., 2022). Nine studies demonstrated no change in alpha or beta-diversity with  
201 exercise training (Taniguchi et al., 2018; Cronin et al., 2019; Liu et al., 2020; Motiani et al.,  
202 2020; Resende et al., 2021; Warbeck et al., 2021; Zhong et al., 2021; Calabrese et al., 2022; Sun  
203 et al., 2022).

##### 204 *Animal studies*

205 Thirteen intervention studies in animal models examined microbial diversity outcomes.

206 Three mice studies captured differences in diversity outcomes. Aerobic exercise 5x/wk resulted  
207 in lower Chao1 index in male B57BL mice when compared to the sedentary control after 14 wk  
208 (Yang et al., 2021a). In another study that examined the effects of exercise in response to aging  
209 over the course of 7 months found that PolgA mut/mut mice undergoing aerobic exercise 4x/wk  
210 had differential effects in Bray-Curtis dissimilarity compared to PolgA mut/mut sedentary at 7  
211 months (Houghton et al., 2018). Aerobic exercise of various durations (20 minutes, 40 minutes,  
212 and 60 minutes) resulted in greater observed OTU's, Shannon's index, lower Simpson's index,



213 and differential Bray-Curtis dissimilarity in female C57BL/6J mice at 4 wk compared to control  
214 that had unrestricted access to run (Chen et al., 2021).

215 Two rat studies captured differences in diversity outcomes. In one study that incorporated  
216 aerobic exercise at different temperature conditions found that exercise only resulted in increased  
217 Shannon's index over 5 wk, whereas exercise alone vs. control resulted in differential alterations  
218 in bray-curtis and weighted unifrac at 5 wk (Meng et al., 2020). A 12 wk resistance training  
219 intervention resulted in greater Chao1 index and differential unweighted unifrac diversity in  
220 comparison to control after 12 wk (Castro et al., 2021).

221 Three horse studies captured differences in diversity outcomes. In one study, a twelve-wk  
222 aerobic exercise training intervention decreased Shannon's index at the phyla level after 2 wk of  
223 intervention which then increased from wk 4 to wk 6 (Janabis et al., 2016). In another study,  
224 aerobic exercise resulted in differential Jaccard diversity at 6 wk in comparison to control (De  
225 Almeida et al., 2016). In a weight-loss intervention, aerobic exercise for 6 wk increased Fisher  
226 alpha index, richness index, and Simpson index (Walshe et al., 2021).

227 Five studies demonstrated no change in alpha or beta-diversity with exercise training (Mika et  
228 al., 2015; Janabi et al., 2017; Lamoureux et al., 2017; Ribeiro et al., 2019; Giacco et al., 2020).

229

### 230 *Effects of exercise interventions on microbial phyla and genera composition*

#### 231 *Human studies*

232 Overall, fifteen studies in humans examined taxonomic composition at the phylum and  
233 genus levels. Four studies were conducted in healthy individuals. In healthy males, 10 wk of  
234 cycling resulted in increased abundance of the genus *Streptococcus* and an unidentified genus in  
235 the *Clostridiales* order compared to the non-exercising controls (Resende et al., 2021). In elderly  
236 females, brisk walking increased the genus *Bacteroides*, while trunk muscle training  
237 demonstrated no effects (Morita et al., 2019). In another study conducted in elderly females, a  
238 combined aerobic and resistance training program for 8 wk decreased the phylum *Firmicutes* and  
239 increased the genera *Phascolarctobacterium* and *Mitsuokella* (Zhong et al., 2021). In elderly  
240 males, a 5 wk cycling intervention increased abundance of the genus *Oscillospira* compared to  
241 the control (Taniguchi et al., 2018).

242 Four studies were conducted in healthy individuals with overweight and obesity. A 10  
243 wk aerobic exercise training intervention in sedentary females increased genus *Bifidobacterium*  
244 in comparison to the control (Mahdieh et al., n.d.). In a dietary intervention that incorporated  
245 exercise training, the low carbohydrate (LC) diet and aerobic exercise (moderate (MICT) and  
246 high intensity (HIIT)) groups exhibited lower abundance of genera *Alistipes* at 4 wk, while the  
247 LC-MICT had higher abundance of the genus *Blautia* compared to LC alone (Sun et al., 2022).  
248 The LC-HIIT group also decreased *Bifidobacterium* abundance over 4 wk (Sun et al., 2022).  
249 Two studies did not find any effects of exercise training on phyla or genera composition (Kern et  
250 al., 2020; Dupuit et al., 2022).

251 Seven studies were conducted in populations with pre-diabetes, diabetes, NAFLD, IBD,  
252 Multiple Sclerosis (MS), or celiac disease.

253 In a T2D population, moderate-intensity combined aerobic and resistance training led to  
254 higher collective abundance of phyla *Verrucomicrobia*, *Actinobacteria*, and *Desulfobacterota*,  
255 and genus *Bifidobacterium* compared to high-intensity combined aerobic and resistance training  
256 after 8 wk (Torquati et al., 2022). In a prediabetic and diabetic population, both moderate  
257 intensity continuous training and sprint interval training for 2 wk decreased the  
258 Firmicutes/Bacteroidetes ratio driven by an increase in Bacteroidetes, and decreased genera  
259 *Blautia* and *Clostridium*, while only the moderate continuous training group increased genera  
260 *Veillonella* and *Faecalibacterium*, and only sprint interval training increased genus *Lachnospira*  
261 (Exercise Training Modulates Gut Microbiota Profile and Improves Endotoxemia..pdf, n.d.). In a  
262 diabetic population, a 12-month lifestyle intervention consisting of dietary counseling and  
263 exercise decreased the Firmicutes/Bacteroidetes ratio and increased abundance of genera  
264 *Bacteroides* and *Roseburia* similar to the standard of care (Wei et al., 2022).

265 In individuals with NAFLD, the aerobic exercise only group exhibited greater genera  
266 *Bilophila*, *Roseburia*, *Erysipelotrichaceae\_UCG\_003*, *Hungatella*, and  
267 *Lachnospiraceae\_UCG\_004* whereas the aerobic exercise plus diet group exhibited greater  
268 genera *Alistipes*, *Bacteroides*, *Bilophilla*, *Butyricimonas*, *Roseburia*, and several genera in the  
269 *Lachnospiraceae* and *Ruminococcaceae* families (Cheng et al., 2022) after the intervention in  
270 comparison to the control. In another study, a low glycemic index Mediterranean diet in  
271 conjunction with an aerobic exercise intervention for 3 months led to higher abundance of genera  
272 *Ruminococcus*, *Lachnospiraceae\_GCA900066575*, *Clostridia VadinBB60* group, *Enterorabdus*,  
273 *Coprobacter*, *UCG002 (Oscillospiraceae)*, *Intestinimonas*, and *Ruminococcaceae\_g\_UBA1819*,  
274 and lower abundance of *Coproccoccus* in individuals with NAFLD in comparison to the diet and  
275 exercise alone groups (Calabrese et al., 2022).

276 In individuals with MS, a 6-month home-based combined aerobic and exercise training  
277 program increased genus *Prevotella* compared to a non-exercising control (Mokhtarzade et al.,  
278 2021). In individuals with celiac disease, a 12 wk HIIT intervention enriched genera  
279 *Parabacteroides* and *DeFluviitaleaceae* (Warbeck et al., 2021).

280

## 281 *Animal studies*

282 Twelve intervention studies in animal models examined taxonomic composition at the  
283 phylum or genus levels.

284 All four studies in mouse models examined the effects of aerobic exercise on the gut  
285 microbiome. Aerobic exercise 5x/wk resulted in higher abundance of phylum *Actinobacteria* and  
286 lower abundance of genera *Bacteroides*, *Parabacteroides*, and *Odoribacteria* in male B57BL  
287 mice compared to control group after 14 wk (Yang et al., 2021a). Moreover, the exercise group  
288 showed an increase in the genera *Bifidobacterium*, *Coprococcus*, and an unidentified genus in  
289 the *Clostridiales* order over 14 wk (Yang et al., 2021a). In a similar model of male B57BL mice,  
290 the effects of a high fat diet were compared to a standard chow diet with and without 8 wk of  
291 aerobic exercise (Ribeiro et al., 2019). They only observed changes at the genus level with both  
292 exercise groups exhibiting higher *Vagococcus* and lower *Proteus* abundances after the training  
293 period when compared to their non-exercising controls. In another study, aerobic exercise led to  
294 higher phyla *Bacteroidetes* and *Verrucomicrobia* and lower *Firmicutes* compared to the control  
295 at 4 wk (Chen et al., 2021). At the genus level, exercise led to higher *Akkermansia*, *Clostridium*,  
296 *Parabacteroides*, *Christensenella*, *Dorea*, *Roseburia*, and *Paraprevotella* and lower

297 *Anaerotruncus*, *Jeotgalicoccus*, *Flexispira*, *Alistipes*, *Ruminococcus*, and *Desulfovibrio*  
298 compared to the control at 4 wk (Chen et al., 2021). In the PolgA mut/mut mice study  
299 (Houghton et al., 2018), aerobic exercise for 7 months increased the Firmicutes:Bacteroidetes  
300 ratio and the genus *Bacteroides*. Additionally, the exercise groups exhibited a higher abundance  
301 of the genera *Muucispirillum* and *Desulfovibrio* when compared to the non-exercised controls at  
302 7 months (Houghton et al., 2018).

303 Four studies conducted in rats examined the effects of exercise training on phyla or  
304 genera outcomes. A 12 wk resistance training intervention in male Wistar rats resulted in  
305 decreased *Pseudomonas*, *Serratia*, *Comamonas* but increased *Coprococcus\_1* in comparison to  
306 the control (Castro et al., 2021). In the study that incorporated aerobic exercise at different  
307 temperature conditions, exercise at room temperature for 5 wk resulted in increases in the genera  
308 *Parabacteroides*, *Ruminiclostridium*, *Allobaculum*, *Faecalibaculum*, *Faecalitalea*, *Holdemania*,  
309 and *Gelria* when compared to the non-exercising control (Meng et al., 2020). Exercise with  
310 different modalities of cold exposure also resulted in other changes at the phylum and genera  
311 level which were not consistent for exercise as whole (Meng et al., 2020). Moreover, in a  
312 voluntary wheel running study, exercise for 6 wk resulted in increased *Rikenellaceae* family  
313 genera *AF12* and an unclassified genus, and *Turicibacter* (Mika et al., 2015). One rat study did  
314 not find any effect of exercise training on phylum or genus taxonomic composition (Giacco et  
315 al., 2020).

316 Four studies conducted in horse models tested the effects of aerobic exercise and/or other  
317 lifestyle interventions on phyla or genera outcomes. In a weight-loss intervention, aerobic  
318 exercise led to higher abundance of the genus *Coprococcus* compared to the non-exercising  
319 control group at 6 wk (Walshe et al., 2021). In another study, a 12 wk aerobic exercise  
320 intervention led to an increase of the phylum *Bacteroidetes* in the first 2 wk and then a decrease  
321 from wk 4 to wk 6 (Janabis et al., 2016). A progressive increase in the phylum *Proteobacteria*  
322 was also observed from wk 4 to wk 6 to wk 8, and in the phylum *Spirochaetes* from wk 2 to wk  
323 4, however there was a reduction in *Spirochaetes* from wk 8 to wk 10 in response to exercise. At  
324 the genus level, *Clostridium* increased from wk 0 to wk 2 and decreased from wk 2 to wk 4,  
325 whereas *Dysgonomonas* increased from wk 2 to wk 4 and decreased from wk 4 to wk 6 in  
326 response to exercise. Two horse studies did not find any effect of exercise training on phyla or  
327 genus taxonomic composition (De Almeida et al., 2016; Janabi et al., 2017).

328

## 329 *Effects of exercise interventions on microbial metabolites*

### 330 *Human studies*

331 Only three human studies assessed effects of exercise training on gut microbiome derived  
332 metabolites. High-intensity combined aerobic and resistance training for 12 wk in males with  
333 overweight and obesity resulted in a decrease in fecal and serum BCAA and aromatic AA, and  
334 an increase in fecal propionate and GABA, and serum SCFA in exercise responders (Liu et al.,  
335 2020). Additionally, Cronin et al. (Cronin et al., 2018a) found that a combined aerobic  
336 resistance training program of moderate intensity for 8 wk resulted in a greater decrease in  
337 urinary PAG and TMAO compared to the protein only group. A similar study did not find any  
338 effects of exercise training on fecal SCFAs in individuals with type 2 diabetes (Torquati et al.,  
339 2022).



340 *Animal studies*

341 Only two animal studies assessed gut microbial metabolites. Four wk of aerobic training  
342 of different durations (20,40, or 60 min) in female C57BL/6J WT mice resulted in lower serum  
343 D-Lac, LPS, and DAO in comparison to unrestricted running control (Chen et al., 2021).  
344 However, no differences in fecal metabolomics profiles were found with aerobic training in  
345 overweight or obese mixed breed horses undergoing weight-loss (Walshe et al., 2021).

346 **Risk of bias and quality of assessment of studies included in systematic review**

347 Characteristics of the included human studies are summarized in **Table 3**. Seven articles  
348 were rated positive, indicating that they had adequately addressed issues of bias, generalizability,  
349 and data collection. The remaining 12 were found to be neutral, meaning they were neither  
350 exceptionally weak nor exceptionally strong. Characteristics of the included animal studies are  
351 summarized in **Table 4**. One article was rated as positive, 11 as neutral, and 1 as negative,  
352 indicating that it has inadequately addressed validity criteria. Overall, the human and animal  
353 studies lacked consistency in reporting of statistical analyses and interpretation of data. The  
354 issues with statistical analyses pertain to not reporting or including overall exercise group by  
355 time interaction effects, or adjusting post-intervention values for pre-intervention values in the  
356 statistical model, not accounting for repeated measures, restricting analysis to only selected  
357 exercise arms without specifying a priori hypotheses, insufficient description of the statistical  
358 model for interpretation of results, or interpretation based on post hoc tests even when interaction  
359 effects were not significant.

360

361 **4. Discussion**

362 *Summary of evidence*

363 More than 50% of the studies did not demonstrate any exercise effects on microbial  
364 diversity in humans. Of those that did, exercise was found to generally favor an increase in  
365 Shannon's index, an index of microbial richness and evenness, regardless of disease status.  
366 However, when combined with dietary changes, the impact on alpha-diversity can vary. For  
367 instance, one study demonstrated opposite effects for archaeal versus bacterial Shannon's index  
368 in response to a combined aerobic and dietary protein intervention (Cronin et al., 2018b). The  
369 weighted unifrac measure, a phylogenetic measure that accounts for the relatedness of microbial  
370 taxa, was the most commonly reported beta-diversity metric. Changes in other beta-diversity  
371 measures, like Bray-Curtis dissimilarity, both weighted and unweighted Unifrac, and Euclidean  
372 diversity, were also documented regardless of disease status and exercise type. The direction of  
373 these changes, however, wasn't specified. A greater proportion of animal studies reported  
374 changes in diversity compared to human studies. However, no clear pattern emerged due to the  
375 mixed effects of exercise (predominantly aerobic) on alpha or beta-diversity metrics.

376 According to ecological theory, diversity in the gut microbiome, both in terms of species  
377 richness and functional response, is integral to its resilience (Lozupone et al., 2012). A diverse  
378 microbiome is better equipped to resist invaders and efficiently use resources. Notably, even  
379 when certain species are compromised, others, with similar functions, can step in, ensuring  
380 stability. This phenomenon is further demonstrated by the functional redundancy seen in various  
381 bacteria in the gut. Thus, a richer and functionally diverse microbiome may offer greater stability

382 and adaptability in the face of disturbances (Lozupone et al., 2012). Hence, the success of an  
383 exercise intervention may be predicated upon the baseline microbiome composition of  
384 individuals, which in turn can be influenced by disease status, dietary habits, and other  
385 environmental factors. Whether individuals with a less diverse or less stable microbiome at  
386 baseline may be more susceptible to changes in microbial composition with exercise compared  
387 to individuals with a more diverse and stable microbiome is a hypothesis that should be tested  
388 further. And even if overall diversity doesn't change significantly with exercise, individual taxa  
389 can still be impacted in terms of their relative abundance or metabolic activity.

390 Our review indicates that exercise interventions can also affect taxonomic composition at  
391 the phylum and genus levels. In humans, at the phyla level, exercise was typically associated  
392 with a decrease in the Firmicutes/Bacteroidetes ratio. At the genera level, while *Bacteroides*,  
393 *Roseburia*, *Parabacteroides*, *Blautia*, *Alistipes* were most reported to change in response to  
394 exercise in humans, only *Bacteroides* and *Roseburia*, demonstrated consistent increases with  
395 exercise. *Bacteroides* is a genus involved in many metabolic pathways including sphingolipid  
396 production (Johnson et al., 2020b), SCFA production, bile acid metabolism (Ghosh et al., 2021),  
397 and mucus utilization (Wang et al., 2023). *Roseburia* is majorly involved in the production of  
398 SCFAs, particularly butyrate, and in conjugated fatty acid metabolism (Ghosh et al., 2021). Both  
399 SCFA and conjugated fatty acids, play a role in regulation of intestinal permeability, while  
400 SCFA are also associated with energy homeostasis, and increased glucose tolerance and insulin  
401 sensitivity. Amongst the other genera that showed no consistent effects with exercise, *Blautia*  
402 has been associated with potential probiotic capabilities but is also enriched in IBD (Liu et al.,  
403 n.d.), *Alistipes* has been found to be pathogenic in colorectal cancer but has protective effects in  
404 CVD (Parker et al., 2020), while *Parabacteroides* is implicated in colitis (Dziarski et al., 2016)  
405 but also demonstrates a protective effect in obesity (Wang et al., 2019).

406 In animal models collectively, *Parabacteroides*, *Coprococcus*, *Bacteroides*, and  
407 *Clostridium* were most reported to change in response to exercise. However, only *Coprococcus*,  
408 another SCFA producer, demonstrated consistent increases with exercise. In general, in both  
409 human and animal models, the diversity in intervention duration, exercise modality and intensity,  
410 disease status, dietary factors, baseline microbiota composition etc. appear to have a huge effect  
411 on individual microbial taxa, and due to the limited number of studies, stratification by these  
412 factors was not possible. A common pattern though was an exercise-induced increase in SCFA  
413 producers such as *Christensenella*, *Dorea*, *Roseburia*, *Paraprevotella*, *Ruminiclostridium*, and  
414 *Allobaculum*. Our review of the literature also identified SCFA as the most measured metabolite.  
415 However, due to the limited human and animal studies examining exercise effects on microbial-  
416 produced metabolites including SCFAs, no clear patterns emerged.

#### 417 *Strengths and limitations of review*

418 While a few systematic reviews on this topic have been published (Mailing et al., 2019; Mitchell  
419 et al., 2019; Tzemah Shahar et al., 2020; Clemente et al., 2021; Hughes and Holscher, 2021), the  
420 uniqueness of this systematic review lies in the inclusion of only studies that have a control or  
421 other arm for rigorous comparisons to the intervention arms, and inclusion of both human and  
422 animal studies for a comprehensive overview of the exercise-microbiome literature. However,  
423 like any field in the initial stages, the heterogeneity of exercise intervention designs, taxa  
424 outcomes profiled, and populations recruited, limited the ability to make direct comparisons  
425 among studies. Moreover, several studies included in this review did not account for

426 confounding factors such as dietary habits, medication use, or other environmental factors, that  
427 could influence the relationship between exercise and the microbiome.

#### 428 *Implication of findings, research gaps and future directions*

429 This research underscores the importance of the gut microbiome in personalized health  
430 and precision medicine by providing insights into the potential benefits of exercise on gut  
431 microbial diversity and composition. However, the lack of standardized exercise protocols across  
432 studies makes it challenging to compare results and draw conclusive findings. Establishing  
433 standardized protocols would enable better comparisons and generalizability of results.  
434 Additionally, there is a need for adequately powered studies and rigorous statistical models to  
435 accurately interpret group by time effects in longitudinal studies. In the context of precision  
436 medicine, considering factors such as disease status, exercise modality/intensity, and baseline  
437 microbiota composition can optimize the selection and customization of exercise interventions,  
438 leading to more effective therapeutic strategies for improving gut health.

439 An important research gap in the exercise-microbiome field is the limited utilization of  
440 interspersed designs that incorporate baseline microbiome composition. Currently, the typical  
441 practice is to employ randomization without considering the initial microbial profiles of  
442 participants. However, accounting for baseline microbiome composition or stratifying  
443 participants based on baseline microbiome composition ranges would capture a broader range of  
444 responses to exercise interventions and allow for assessing how these responses depend on the  
445 presence of selected microbes (Johnson et al., 2020a). Understanding an individual's baseline  
446 microbiome composition and its response to exercise is crucial for personalized health.  
447 Individuals with a less diverse or stable microbiome at baseline may be more susceptible to  
448 changes in microbial composition with exercise, emphasizing the importance of tailored  
449 interventions to optimize gut health benefits. Implementing such designs would also improve  
450 statistical power.

451 Furthermore, the identification of specific genera, such as *Bacteroides*, *Roseburia*, and  
452 *Coprococcus*, as consistent responders to exercise highlights their potential as targets for  
453 interventions and biomarkers of exercise-induced changes in the gut microbiome. Future  
454 research should focus on elucidating the underlying mechanisms of these changes and their  
455 impact on health outcomes. While changes in microbial composition have been widely studied,  
456 investigating the specific microbial metabolites influenced by exercise is crucial to unravel the  
457 functional implications of exercise-induced microbiome changes. To gain a better understanding  
458 of the variability in responses and potential mechanistic insights, it is important to consider  
459 various factors such as employing 'omics techniques to examine biological factors and taking  
460 into account the socioecological context. Other key considerations in microbiome research from  
461 other reviews (Knight et al., 2018; Bharti and Grimm, 2021; Shanahan et al., 2021; Mattes et al.,  
462 2022), although mostly for diet studies, are also applicable to exercise studies.

#### 463 *Conclusions*

464 In conclusion, this systematic review reveals that exercise has the potential to influence  
465 the gut microbiome, with indications of increased microbial diversity and changes in taxonomic  
466 composition. Further research is needed to standardize exercise protocols, incorporate larger  
467 sample sizes, and employ rigorous statistical models. Additionally, investigating the functional  
468 implications of exercise-induced changes in microbial metabolites and understanding the  
469 underlying mechanisms will enhance our understanding of the exercise-microbiome relationship.

470 Considering the growing prevalence of chronic diseases, such as obesity, diabetes, and  
471 cardiovascular disorders, studying the exercise-microbiome relationship may provide valuable  
472 insights for preventive and therapeutic interventions. Targeted exercise programs that promote a  
473 favorable microbial profile could potentially serve as a non-invasive and cost-effective approach  
474 to support overall health and mitigate the risk of chronic diseases. These advancements can guide  
475 the development of personalized exercise interventions for optimizing health.

#### 476 **Conflict of Interest**

477 The authors declare that the research was conducted in the absence of any commercial or  
478 financial relationships that could be construed as a potential conflict of interest.

#### 479 **Author contributions**

480 The authors' responsibilities were as follows—JD and JC: conceptualized the study; JD, JC, and  
481 SS: extracted and analyzed data; JD, JC, and SS: wrote the manuscript; and all authors read and  
482 approved the final manuscript and take responsibility for the final content.

#### 483 **References**

- 484 Academy of Nutrition and Dietetics (n.d.). Evidence Analysis Manual. Available at:  
485 <https://www.andeal.org/evidence-analysis-manual> [Accessed April 5, 2023].
- 486 Barton, W., Penney, N. C., Cronin, O., Garcia-Perez, I., Molloy, M. G., Holmes, E., et al. (2018).  
487 The microbiome of professional athletes differs from that of more sedentary subjects in  
488 composition and particularly at the functional metabolic level. *Gut* 67, 625–633. doi:  
489 10.1136/gutjnl-2016-313627.
- 490 Bharti, R., and Grimm, D. G. (2021). Current challenges and best-practice protocols for  
491 microbiome analysis. *Brief Bioinform* 22, 178–193. doi: 10.1093/bib/bbz155.
- 492 Calabrese, F. M., Disciglio, V., Franco, I., Sorino, P., Bonfiglio, C., Bianco, A., et al. (2022). A  
493 Low Glycemic Index Mediterranean Diet Combined with Aerobic Physical Activity  
494 Rearranges the Gut Microbiota Signature in NAFLD Patients. *Nutrients* 14. doi:  
495 10.3390/nu14091773.
- 496 Castro, A., Silva, K., Medeiros, C., Alves, F., Araujo, R., and Almeida, J. (2021). Effects of 12  
497 weeks of resistance training on rat gut microbiota composition. *JOURNAL OF*  
498 *EXPERIMENTAL BIOLOGY* 224. doi: 10.1242/jeb.242543.
- 499 Chen, H., Shen, L., Liu, Y., Ma, X., Long, L., Ma, X., et al. (2021). Strength Exercise Confers  
500 Protection in Central Nervous System Autoimmunity by Altering the Gut Microbiota.  
501 *FRONTIERS IN IMMUNOLOGY* 12. doi: 10.3389/fimmu.2021.628629.
- 502 Cheng, R., Wang, L., Le, S., Yang, Y., Zhao, C., Zhang, X., et al. (2022). A randomized  
503 controlled trial for response of microbiome network to exercise and diet intervention in  
504 patients with nonalcoholic fatty liver disease. *Nature Communications* 13. doi:  
505 10.1038/s41467-022-29968-0.

- 506 Cheng, Y., Xie, G., Chen, T., Qiu, Y., Zou, X., Zheng, M., et al. (2012). Distinct urinary  
507 metabolic profile of human colorectal cancer. *Journal of Proteome Research* 11, 1354–  
508 1363. doi: 10.1021/pr201001a.
- 509 Clarke, S. F., Murphy, E. F., O’Sullivan, O., Lucey, A. J., Humphreys, M., Hogan, A., et al.  
510 (2014). Exercise and associated dietary extremes impact on gut microbial diversity. *Gut*  
511 63, 1913–1920. doi: 10.1136/gutjnl-2013-306541.
- 512 Clemente, F., Bravini, E., Corna, S., Colombo, E., Sartorio, F., Rinaldi, C., et al. (2021). [The  
513 relationship between physical exercise and gut microbiota in the human being: a  
514 systematic review]. *Epidemiol Prev* 45, 245–253. doi: 10.19191/EP21.4.P245.080.
- 515 Cochrane Handbook for Systematic Reviews of Interventions (n.d.). Available at:  
516 <https://training.cochrane.org/handbook> [Accessed January 12, 2023].
- 517 Cronin, O., Barton, W., Moran, C., Sheehan, D., Whiston, R., Nugent, H., et al. (2019).  
518 Moderate-intensity aerobic and resistance exercise is safe and favorably influences body  
519 composition in patients with quiescent Inflammatory Bowel Disease: A randomized  
520 controlled cross-over trial. *BMC Gastroenterology* 19. doi: 10.1186/s12876-019-0952-x.
- 521 Cronin, O., Barton, W., Skuse, P., Penney, N. C., Garcia-Perez, I., Murphy, E. F., et al. (2018a).  
522 A prospective metagenomic and metabolomic analysis of the impact of exercise and/or  
523 whey protein supplementation on the gut microbiome of sedentary adults. *mSystems* 3.  
524 doi: 10.1128/mSystems.00044-18.
- 525 Cronin, O., Barton, W., Skuse, P., Penney, N. C., Garcia-Perez, I., Murphy, E. F., et al. (2018b).  
526 A Prospective Metagenomic and Metabolomic Analysis of the Impact of Exercise and/or  
527 Whey Protein Supplementation on the Gut Microbiome of Sedentary Adults. *mSystems* 3.  
528 doi: 10.1128/mSystems.00044-18.
- 529 De Almeida, M. L. M., Feringer, W. H., Jr., Carvalho, J. R. G., Rodrigues, I. M., Jordão, L. R.,  
530 Fonseca, M. G., et al. (2016). Intense exercise and aerobic conditioning associated with  
531 chromium or L-carnitine supplementation modified the fecal microbiota of fillies. *PLoS*  
532 *ONE* 11. doi: 10.1371/journal.pone.0167108.
- 533 Dupuit, M., Rance, M., Morel, C., Bouillon, P., Boscaro, A., Martin, V., et al. (2022). Effect of  
534 Concurrent Training on Body Composition and Gut Microbiota in Postmenopausal  
535 Women with Overweight or Obesity. *Med Sci Sports Exerc* 54, 517–529. doi:  
536 10.1249/MSS.0000000000002809.
- 537 Dziarski, R., Park, S. Y., Kashyap, D. R., Dowd, S. E., and Gupta, D. (2016). Pglyrp-Regulated  
538 Gut Microflora *Prevotella falsenii*, *Parabacteroides distasonis* and *Bacteroides eggerthii*  
539 Enhance and *Alistipes finegoldii* Attenuates Colitis in Mice. *PLOS ONE* 11, e0146162.  
540 doi: 10.1371/journal.pone.0146162.
- 541 Egan, B., and Zierath, J. R. (2013). Exercise metabolism and the molecular regulation of skeletal  
542 muscle adaptation. *Cell Metab* 17, 162–184. doi: 10.1016/j.cmet.2012.12.012.



- 543 Ghosh, S., Whitley, C. S., Haribabu, B., and Jala, V. R. (2021). Regulation of Intestinal Barrier  
544 Function by Microbial Metabolites. *Cell Mol Gastroenterol Hepatol* 11, 1463–1482. doi:  
545 10.1016/j.jcmgh.2021.02.007.
- 546 Giacco, A., delli Paoli, G., Simiele, R., Caterino, M., Ruoppolo, M., Bloch, W., et al. (2020).  
547 Exercise with food withdrawal at thermoneutrality impacts fuel use, the microbiome,  
548 AMPK phosphorylation, muscle fibers, and thyroid hormone levels in rats. *Physiol Rep* 8,  
549 e14354. doi: 10.14814/phy2.14354.
- 550 Hoffman-Goetz, L., Pervaiz, N., and Guan, J. (2009). Voluntary exercise training in mice  
551 increases the expression of antioxidant enzymes and decreases the expression of TNF-  
552 alpha in intestinal lymphocytes. *Brain Behav Immun* 23, 498–506. doi:  
553 10.1016/j.bbi.2009.01.015.
- 554 Hoffman-Goetz, L., Pervaiz, N., Packer, N., and Guan, J. (2010). Freewheel training decreases  
555 pro- and increases anti-inflammatory cytokine expression in mouse intestinal  
556 lymphocytes. *Brain Behav Immun* 24, 1105–1115. doi: 10.1016/j.bbi.2010.05.001.
- 557 Houghton, D., Stewart, C. J., Stamp, C., Nelson, A., Aj Ami, N. J., Petrosino, J. F., et al. (2018).  
558 Impact of Age-Related Mitochondrial Dysfunction and Exercise on Intestinal Microbiota  
559 Composition. *Journals of Gerontology - Series A Biological Sciences and Medical  
560 Sciences* 73, 571–578. doi: 10.1093/gerona/glx197.
- 561 Hughes, R. L., and Holscher, H. D. (2021). Fueling Gut Microbes: A Review of the Interaction  
562 between Diet, Exercise, and the Gut Microbiota in Athletes. *Adv Nutr* 12, 2190–2215.  
563 doi: 10.1093/advances/nmab077.
- 564 Ismail, A. S., Severson, K. M., Vaishnava, S., Behrendt, C. L., Yu, X., Benjamin, J. L., et al.  
565 (2011). Gammadelta intraepithelial lymphocytes are essential mediators of host-microbial  
566 homeostasis at the intestinal mucosal surface. *Proc Natl Acad Sci U S A* 108, 8743–8748.  
567 doi: 10.1073/pnas.1019574108.
- 568 Janabi, A. H. D., Biddle, A. S., Klein, D. J., and McKeever, K. H. (2017). The effects of acute  
569 strenuous exercise on the faecal microbiota in Standardbred racehorses. *Comparative  
570 Exercise Physiology* 13, 13–24. doi: 10.3920/CEP160030.
- 571 Janabis, A. H. D., Biddle, A. S., Klein, D., and McKeever, K. H. (2016). Exercise training-  
572 induced changes in the gut microbiota of Standardbred racehorses. *Comparative Exercise  
573 Physiology* 12, 119–130. doi: 10.3920/CEP160015.
- 574 Johnson, A. J., Zheng, J. J., Kang, J. W., Saboe, A., Knights, D., and Zivkovic, A. M. (2020a). A  
575 Guide to Diet-Microbiome Study Design. *Frontiers in Nutrition* 7. Available at:  
576 <https://www.frontiersin.org/articles/10.3389/fnut.2020.00079> [Accessed June 20, 2023].
- 577 Johnson, E. L., Heaver, S. L., Waters, J. L., Kim, B. I., Bretin, A., Goodman, A. L., et al.  
578 (2020b). Sphingolipids produced by gut bacteria enter host metabolic pathways  
579 impacting ceramide levels. *Nat Commun* 11, 2471. doi: 10.1038/s41467-020-16274-w.

- 580 Kakiyama, G., Pandak, W. M., Gillevet, P. M., Hylemon, P. B., Heuman, D. M., Daita, K., et al.  
581 (2013). Modulation of the fecal bile acid profile by gut microbiota in cirrhosis. *J Hepatol*  
582 58, 949–955. doi: 10.1016/j.jhep.2013.01.003.
- 583 Kern, T., Blond, M. B., Hansen, T. H., Rosenkilde, M., Quist, J. S., Gram, A. S., et al. (2020).  
584 Structured exercise alters the gut microbiota in humans with overweight and obesity—A  
585 randomized controlled trial. *Int J Obes* 44, 125–135. doi: 10.1038/s41366-019-0440-y.
- 586 Knight, R., Vrbanac, A., Taylor, B. C., Aksenov, A., Callewaert, C., Debelius, J., et al. (2018).  
587 Best practices for analysing microbiomes. *Nat Rev Microbiol* 16, 410–422. doi:  
588 10.1038/s41579-018-0029-9.
- 589 Lamoureux, E. V., Grandy, S. A., and Langille, M. G. I. (2017). Moderate exercise has limited  
590 but distinguishable effects on the mouse microbiome. *mSystems* 2. doi:  
591 10.1128/mSystems.00006-17.
- 592 Liu, X., Mao, B., Gu, J., Wu, J., Cui, S., Wang, G., et al. (n.d.). Blautia—a new functional genus  
593 with potential probiotic properties? *Gut Microbes* 13, 1875796. doi:  
594 10.1080/19490976.2021.1875796.
- 595 Liu, Y., Wang, Y., Ni, Y., Cheung, C. K. Y., Lam, K. S. L., Wang, Y., et al. (2020). Gut  
596 Microbiome Fermentation Determines the Efficacy of Exercise for Diabetes Prevention.  
597 *Cell Metabolism* 31, 77-91.e5. doi: 10.1016/j.cmet.2019.11.001.
- 598 Lozupone, C. A., Stombaugh, J. I., Gordon, J. I., Jansson, J. K., and Knight, R. (2012). Diversity,  
599 stability and resilience of the human gut microbiota. *Nature* 489, 220–230. doi:  
600 10.1038/nature11550.
- 601 Mahdiah, M., Maryam, J., Bitar, B., Neda, F., Motahare, M., Mahboobeh, B., et al. (n.d.). A pilot  
602 study on the relationship between Lactobacillus, Bifidobacterium counts and inflammatory  
603 factors following exercise training. *ARCHIVES OF PHYSIOLOGY AND*  
604 *BIOCHEMISTRY*. doi: 10.1080/13813455.2021.1871763.
- 605 Mailing, L. J., Allen, J. M., Buford, T. W., Fields, C. J., and Woods, J. A. (2019). Exercise and  
606 the Gut Microbiome: A Review of the Evidence, Potential Mechanisms, and Implications  
607 for Human Health. *Exercise and Sport Sciences Reviews* 47, 75. doi:  
608 10.1249/JES.000000000000183.
- 609 Mattes, R. D., Rowe, S. B., Ohlhorst, S. D., Brown, A. W., Hoffman, D. J., Liska, D. J., et al.  
610 (2022). Valuing the Diversity of Research Methods to Advance Nutrition Science.  
611 *Advances in Nutrition* 13, 1324–1393. doi: 10.1093/advances/nmac043.
- 612 Meissner, M., Lombardo, E., Havinga, R., Tietge, U. J. F., Kuipers, F., and Groen, A. K. (2011).  
613 Voluntary wheel running increases bile acid as well as cholesterol excretion and  
614 decreases atherosclerosis in hypercholesterolemic mice. *Atherosclerosis* 218, 323–329.  
615 doi: 10.1016/j.atherosclerosis.2011.06.040.

- 616 Meng, Y., Chen, L., Lin, W., Wang, H., Xu, G., and Weng, X. (2020). Exercise Reverses the  
617 Alterations in Gut Microbiota Upon Cold Exposure and Promotes Cold-Induced Weight  
618 Loss. *Front Physiol* 11, 311. doi: 10.3389/fphys.2020.00311.
- 619 Mika, A., Treuren, W. V., González, A., Herrera, J. J., Knight, R., and Fleshner, M. (2015).  
620 Exercise Is More Effective at Altering Gut Microbial Composition and Producing Stable  
621 Changes in Lean Mass in Juvenile versus Adult Male F344 Rats. *PLOS ONE* 10,  
622 e0125889. doi: 10.1371/journal.pone.0125889.
- 623 Mitchell, C. M., Davy, B. M., Hulver, M. W., Neilson, A. P., Bennett, B. J., and Davy, K. P.  
624 (2019). Does Exercise Alter Gut Microbial Composition? A Systematic Review. *Med Sci*  
625 *Sports Exerc* 51, 160–167. doi: 10.1249/MSS.0000000000001760.
- 626 Moitinho-Silva, L., Wegener, M., May, S., Schrinner, F., Akhtar, A., Boysen, T., et al. (2021).  
627 Short-term physical exercise impacts on the human holobiont obtained by a randomised  
628 intervention study. *BMC MICROBIOLOGY* 21. doi: 10.1186/s12866-021-02214-1.
- 629 Mokhtarzade, M., Shamsi, M., Abolhasani, M., Bakhshi, B., Sahraian, M., Quinn, L., et al.  
630 (2021). Home-based exercise training influences gut bacterial levels in multiple sclerosis.  
631 *COMPLEMENTARY THERAPIES IN CLINICAL PRACTICE* 45. doi:  
632 10.1016/j.ctcp.2021.101463.
- 633 Morita, E., Yokoyama, H., Imai, D., Takeda, R., Ota, A., Kawai, E., et al. (2019). Aerobic  
634 exercise training with brisk walking increases intestinal bacteroides in healthy elderly  
635 women. *Nutrients* 11. doi: 10.3390/nu11040868.
- 636 Motiani, K. K., Collado, M. C., Eskelinen, J.-J., Virtanen, K. A., Löyttyniemi, E., Salminen, S.,  
637 et al. (2020). Exercise Training Modulates Gut Microbiota Profile and Improves  
638 Endotoxemia. *Medicine and Science in Sports and Exercise* 52, 94. doi:  
639 10.1249/MSS.0000000000002112.
- 640 Oxford Centre for Evidence-Based Medicine: Levels of Evidence (March 2009) — Centre for  
641 Evidence-Based Medicine (CEBM), University of Oxford (n.d.). Available at:  
642 [https://www.cebm.ox.ac.uk/resources/levels-of-evidence/oxford-centre-for-evidence-](https://www.cebm.ox.ac.uk/resources/levels-of-evidence/oxford-centre-for-evidence-based-medicine-levels-of-evidence-march-2009)  
643 [based-medicine-levels-of-evidence-march-2009](https://www.cebm.ox.ac.uk/resources/levels-of-evidence/oxford-centre-for-evidence-based-medicine-levels-of-evidence-march-2009) [Accessed January 20, 2023].
- 644 Packer, N., and Hoffman-Goetz, L. (2012). Exercise training reduces inflammatory mediators in  
645 the intestinal tract of healthy older adult mice. *Can J Aging* 31, 161–171. doi:  
646 10.1017/S0714980812000104.
- 647 Parker, B. J., Wearsch, P. A., Veloo, A. C. M., and Rodriguez-Palacios, A. (2020). The Genus  
648 *Alistipes*: Gut Bacteria With Emerging Implications to Inflammation, Cancer, and Mental  
649 Health. *Frontiers in Immunology* 11. Available at:  
650 <https://www.frontiersin.org/articles/10.3389/fimmu.2020.00906> [Accessed August 21,  
651 2023].

- 652 Resende, A., Leite, G., and Junior, A. (2021). Changes in the Gut Bacteria Composition of  
653 Healthy Men with the Same Nutritional Profile Undergoing 10-Week Aerobic Exercise  
654 Training: A Randomized Controlled Trial. *NUTRIENTS* 13. doi: 10.3390/nu13082839.
- 655 Ribeiro, F. M., Ribeiro, C. F. A., Cláudia M. G., A., Castro, A. P., Almeida, J. A., Franco, O. L.,  
656 et al. (2019). Limited effects of low-to-moderate aerobic exercise on the gut microbiota  
657 of mice subjected to a high-fat diet. *Nutrients* 11. doi: 10.3390/nu11010149.
- 658 Shanahan, E. R., McMaster, J. J., and Staudacher, H. M. (2021). Conducting research on diet-  
659 microbiome interactions: A review of current challenges, essential methodological  
660 principles, and recommendations for best practice in study design. *J Hum Nutr Diet* 34,  
661 631–644. doi: 10.1111/jhn.12868.
- 662 Sun, S., Lei, O., Nie, J., Shi, Q., Xu, Y., and Kong, Z. (2022). Effects of Low-Carbohydrate Diet  
663 and Exercise Training on Gut Microbiota. *FRONTIERS IN NUTRITION* 9. doi:  
664 10.3389/fnut.2022.884550.
- 665 Sun, S., Lulla, A., Sioda, M., Winglee, K., Wu, M. C., Jacobs, D. R., et al. (2019). Gut  
666 microbiota composition and blood pressure: The CARDIA study. *Hypertension* 73, 998–  
667 1006. doi: 10.1161/HYPERTENSIONAHA.118.12109.
- 668 Taniguchi, H., Tanisawa, K., Sun, X., Kubo, T., Hoshino, Y., Hosokawa, M., et al. (2018).  
669 Effects of short-term endurance exercise on gut microbiota in elderly men. *Physiological*  
670 *Reports* 6. doi: 10.14814/phy2.13935.
- 671 Torquati, L., Gajanand, T., Cox, E. R., Willis, C. R. G., Zaugg, J., Keating, S. E., et al. (2022).  
672 Effects of exercise intensity on gut microbiome composition and function in people with  
673 type 2 diabetes. *European Journal of Sport Science*. doi:  
674 10.1080/17461391.2022.2035436.
- 675 Tzemah Shahar, R., Koren, O., Matarasso, S., Shochat, T., Magzal, F., and Agmon, M. (2020).  
676 Attributes of Physical Activity and Gut Microbiome in Adults: A Systematic Review. *Int*  
677 *J Sports Med* 41, 801–814. doi: 10.1055/a-1157-9257.
- 678 Walshe, N., Cabrera-Rubio, R., Collins, R., Puggioni, A., Gath, V., Crispie, F., et al. (2021). A  
679 Multiomic Approach to Investigate the Effects of a Weight Loss Program on the  
680 Intestinal Health of Overweight Horses. *FRONTIERS IN VETERINARY SCIENCE* 8. doi:  
681 10.3389/fvets.2021.668120.
- 682 Wang, K., Liao, M., Zhou, N., Bao, L., Ma, K., Zheng, Z., et al. (2019). Parabacteroides  
683 distasonis Alleviates Obesity and Metabolic Dysfunctions via Production of Succinate  
684 and Secondary Bile Acids. *Cell Reports* 26, 222-235.e5. doi:  
685 10.1016/j.celrep.2018.12.028.
- 686 Wang, X., Hu, Y., Zhu, X., Cai, L., Farooq, M. Z., and Yan, X. (2023). Bacteroides-derived  
687 isovaleric acid enhances mucosal immunity by facilitating intestinal IgA response in  
688 broilers. *J Anim Sci Biotechnol* 14, 4. doi: 10.1186/s40104-022-00807-y.

689 Warbeck, C., Dowd, A., Kronlund, L., Parmar, C., Daun, J., Wytsma-Fisher, K., et al. (2021).  
690 Feasibility and effects on the gut microbiota of a 12-week high-intensity interval training  
691 plus lifestyle education intervention on inactive adults with celiac disease. *APPLIED*  
692 *PHYSIOLOGY NUTRITION AND METABOLISM* 46, 325–336. doi: 10.1139/apnm-  
693 2020-0459.

694 Wei, S., Brejnrod, A. D., Trivedi, U., Mortensen, M. S., Johansen, M. Y., Karstoft, K., et al.  
695 (2022). Impact of intensive lifestyle intervention on gut microbiota composition in type 2  
696 diabetes: a post-hoc analysis of a randomized clinical trial. *Gut Microbes* 14. doi:  
697 10.1080/19490976.2021.2005407.

698 Yang, H.-L., Li, M.-M., Zhou, M.-F., Xu, H.-S., Huan, F., Liu, N., et al. (2021a). Links Between  
699 Gut Dysbiosis and Neurotransmitter Disturbance in Chronic Restraint Stress-Induced  
700 Depressive Behaviours: the Role of Inflammation. *Inflammation* 44, 2448–2462. doi:  
701 10.1007/s10753-021-01514-y.

702 Yang, W., Liu, Y., Yang, G., Meng, B., Yi, Z., Yang, G., et al. (2021b). Moderate-Intensity  
703 Physical Exercise Affects the Exercise Performance and Gut Microbiota of Mice.  
704 *FRONTIERS IN CELLULAR AND INFECTION MICROBIOLOGY* 11. doi:  
705 10.3389/fcimb.2021.712381.

706 Zhong, X., Powell, C., Phillips, C., Millar, S., Carson, B., Dowd, K., et al. (2021). The Influence  
707 of Different Physical Activity Behaviours on the Gut Microbiota of Older Irish Adults.  
708 *JOURNAL OF NUTRITION HEALTH & AGING* 25, 854–861. doi: 10.1007/s12603-021-  
709 1630-6.

710

711

712

713

714

715

716

717

718

719

720

721

722

723



724 **Figures**

725 Figure 1: PRISMA flow diagram for inclusion of studies in the systematic review.

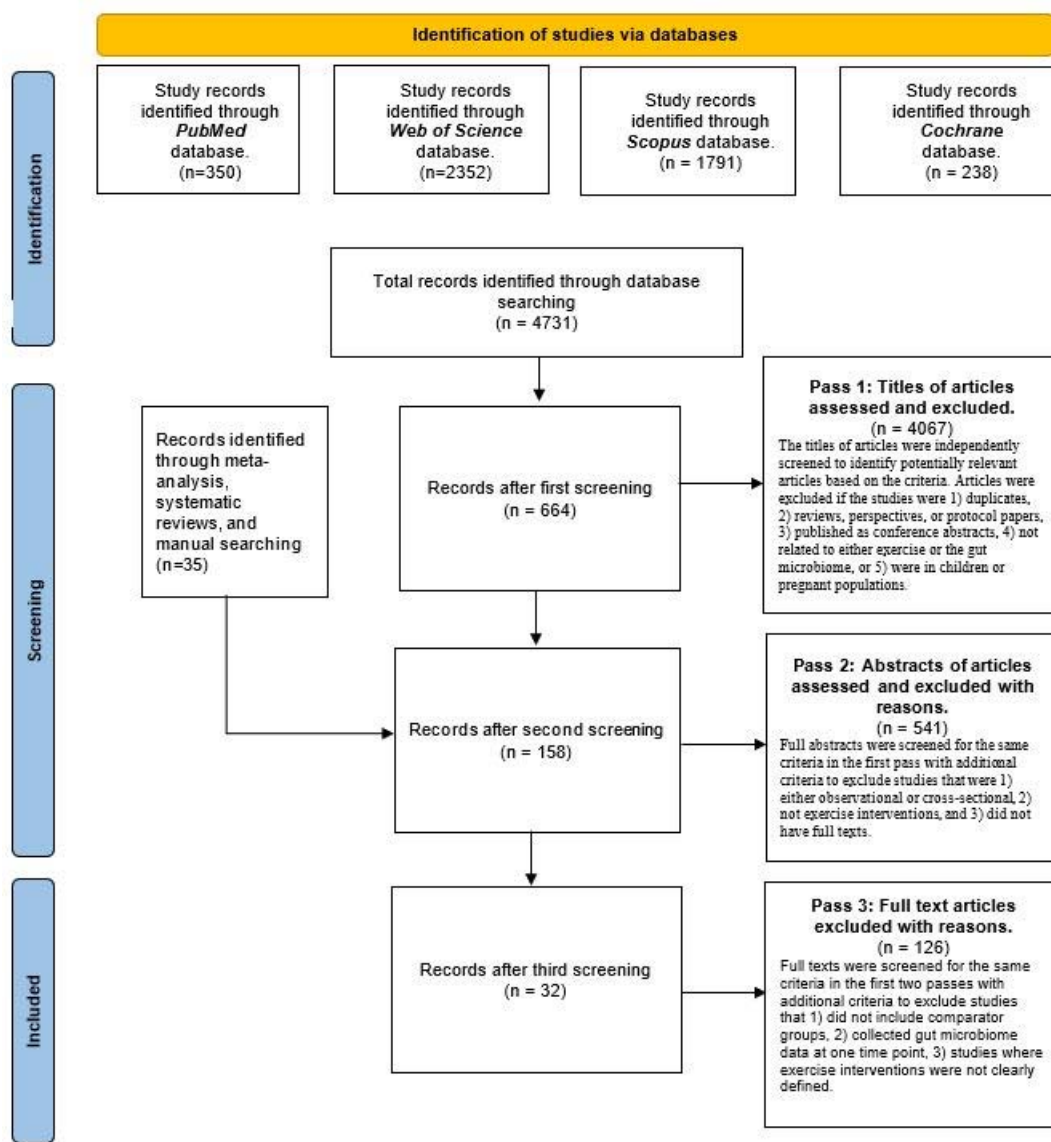

726

727 PRISMA, Preferred Reporting Items for Systematic Reviews and Meta-Analyses.

728

729

730

731

732

733

734

735 Figure 2: Microbiome outcomes stratified by exercise intervention type.

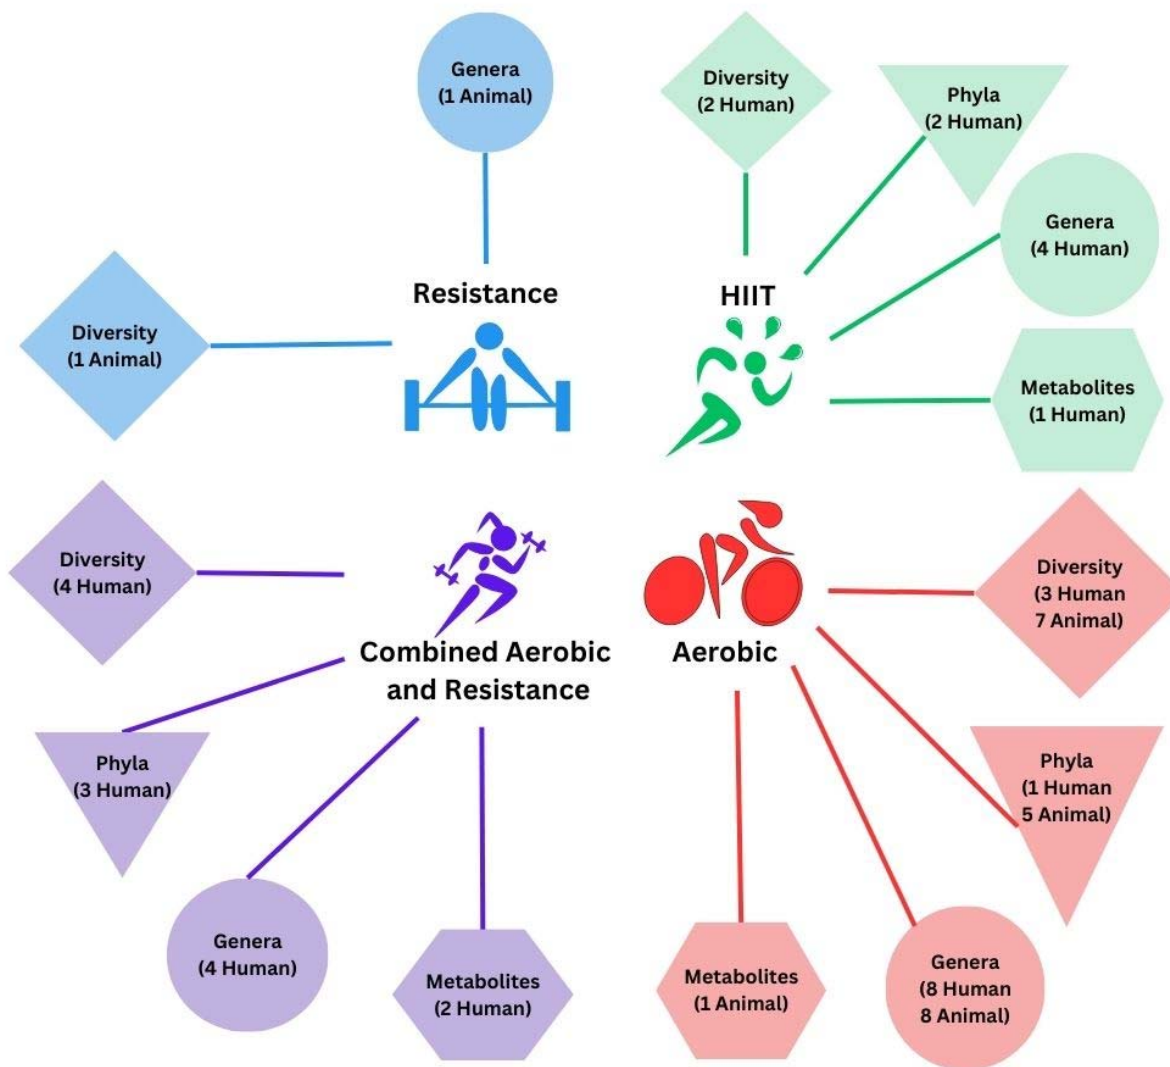

736  
 737 The number indicates the number of studies that demonstrate a change in response to the  
 738 exercise intervention in humans or animal models. Direction of change is not quantified. Studies  
 739 incorporating HIIT are stratified separately regardless of whether the study included other  
 740 exercise components in addition to HIIT.

741

742

743

744 **Tables**

745

746 **Table 1.** Characteristics of the studies included in the systematic review examining the effects of exercise intervention on gut  
 747 microbiome outcomes in humans.

| Author                | Design                | No. of participants    | Intervention                                                                                                                                                                                                                                                                          | Duration | Participant profile                                                             | Phylum | Genus                                                                                                                                                                                                                                                        | Diversity                    | Gut metabolites |
|-----------------------|-----------------------|------------------------|---------------------------------------------------------------------------------------------------------------------------------------------------------------------------------------------------------------------------------------------------------------------------------------|----------|---------------------------------------------------------------------------------|--------|--------------------------------------------------------------------------------------------------------------------------------------------------------------------------------------------------------------------------------------------------------------|------------------------------|-----------------|
| Calabrese et al. 2022 | Randomized (6 groups) | 142 (original dataset) | Physical activity aerobic program (ATFIS_1, n=21) 4x/wk 45-60 min moderate-intensity treadmill walking or cycling @ 60-75% VO2 max<br><br>Physical activity combined aerobic and resistance program (ATFIS_2, n=21) 3x/wk 45-60 min moderate-intensity treadmill walking or cycling @ | 3 mon    | Males and females with moderate to severe NAFLD, age: 30-60 yr, BMI ≥ 25 kg /m2 | N/A    | LGMID + ATFIS_1 (vs. LGMID and ATFIS_1):<br>↑Ruminococcus<br>↑Lachnospiraceae_GCA900066575<br>↑Clostridia<br>VadinBB60 group<br>↑Enterorabdus<br>↑Coproacter<br>↑UCG002 (Oscillospiraceae)<br>↑Intestinimonas<br>↑Ruminococcaceae_g_UBA1819<br>↓ Coprococcus | No change in alpha-diversity | N/A             |

|  |  |  |                                                                                                                                                                                                                                                                    |  |  |  |  |  |
|--|--|--|--------------------------------------------------------------------------------------------------------------------------------------------------------------------------------------------------------------------------------------------------------------------|--|--|--|--|--|
|  |  |  | <p>60–75% VO2 max and 45 min resistance training (12 exercises, 2 sets)</p> <p>Low Glycemic Index Mediterranean Diet (LGIMD, n=21)</p> <p>LGIMD + ATFIS_1 (n=28)</p> <p>LGIMD + ATFIS_2 (n=31)</p> <p>Control diet (n=20): based on CREA-AN dietary guidelines</p> |  |  |  |  |  |
|--|--|--|--------------------------------------------------------------------------------------------------------------------------------------------------------------------------------------------------------------------------------------------------------------------|--|--|--|--|--|

|                   |                       |     |                                                                                                                                                                                                                                                                                                                                 |                  |                                                                                  |     |                                                                                                                                                                                                                                                                                                                                                                                                              |                                                                        |     |
|-------------------|-----------------------|-----|---------------------------------------------------------------------------------------------------------------------------------------------------------------------------------------------------------------------------------------------------------------------------------------------------------------------------------|------------------|----------------------------------------------------------------------------------|-----|--------------------------------------------------------------------------------------------------------------------------------------------------------------------------------------------------------------------------------------------------------------------------------------------------------------------------------------------------------------------------------------------------------------|------------------------------------------------------------------------|-----|
| Cheng et al. 2022 | Randomized (4 groups) | 115 | <p>Aerobic exercise (AEX, n=29): Nordic brisk walking + stretching and other group exercises 2-3x/wk @60-75% VO2max for 30-60 min/session</p> <p>Diet (n=28): fiber-enriched and low-carbohydrate</p> <p>Aerobic exercise + Diet (AED, n=29)</p> <p>No intervention (NI, n=29): current physical activity and eating habits</p> | Average: 8.6 mon | Males and females with NAFLD and prediabetes, age 50-65 yr, Mean BMI: 26.9 kg/m2 | N/A | <p>AEX vs. NI:<br/> ↑ Bilophila<br/> ↑ Erysipelotrichaceae_UCG_003<br/> ↑ Hungatella<br/> ↑ Lachnospiraceae_UCG_004<br/> ↑ Roseburia</p> <p>AED vs. NI:<br/> ↑ Alistipes<br/> ↑ Bacteroides<br/> ↑ Bilophila<br/> ↑ Butyricimonas<br/> ↑ Lachnospiraceae ND3007, NK4A136, UCG_004, and UCG_010 groups<br/> ↑ Roseburia<br/> ↑ Ruminococcaceae NK4A214, UCG_002, and UCG_003 groups<br/> ↑ Ruminococcus_1</p> | NI vs. other groups:<br>↓ Shannon Index<br>Changes in Weighted Unifrac | N/A |
|-------------------|-----------------------|-----|---------------------------------------------------------------------------------------------------------------------------------------------------------------------------------------------------------------------------------------------------------------------------------------------------------------------------------|------------------|----------------------------------------------------------------------------------|-----|--------------------------------------------------------------------------------------------------------------------------------------------------------------------------------------------------------------------------------------------------------------------------------------------------------------------------------------------------------------------------------------------------------------|------------------------------------------------------------------------|-----|



|                    |                       |    |                                                                                                                                                                                                                                                                                                                                                                                  |      |                                                              |     |     |                                                                                                                                                                                                                                         |                                                    |
|--------------------|-----------------------|----|----------------------------------------------------------------------------------------------------------------------------------------------------------------------------------------------------------------------------------------------------------------------------------------------------------------------------------------------------------------------------------|------|--------------------------------------------------------------|-----|-----|-----------------------------------------------------------------------------------------------------------------------------------------------------------------------------------------------------------------------------------------|----------------------------------------------------|
| Cronin et al. 2018 | Randomized (3 groups) | 90 | <p>Exercise only (E, n=30): Combined aerobic resistance training program of moderate intensity 3x/wk<br/> Aerobic exercise: treadmill, crosstrainer, bike, or stepper (modified Borg RPE, 5 to 7/10) 18-32 min/session</p> <p>Resistance exercise: 7 resistance machine based exercises @ 70% 1RM starting intensity</p> <p>Protein only (P, n=30): usual levels of physical</p> | 8 wk | Sedentary males and females, age: 18-40 yr, BMI: 22-35 kg/m2 | N/A | N/A | <p>EP vs. P:<br/> ↓ Archeal Shannon's index at 8 wk<br/> ↑ Bacterial Shannon's index at 8 wk</p> <p>EP vs. E:<br/> ↓ Viral Shannon's index at 8 wk</p> <p>Separation in all species Bray-Curtis dissimilarity by E,EP,and P at 8 wk</p> | E vs. P:<br>Greater ↓ urine PAG and TMAO over 8 wk |
|--------------------|-----------------------|----|----------------------------------------------------------------------------------------------------------------------------------------------------------------------------------------------------------------------------------------------------------------------------------------------------------------------------------------------------------------------------------|------|--------------------------------------------------------------|-----|-----|-----------------------------------------------------------------------------------------------------------------------------------------------------------------------------------------------------------------------------------------|----------------------------------------------------|

|                    |                                           |    |                                                                                                                                                                                                                                      |      |                                                                                                                                  |     |     |           |     |
|--------------------|-------------------------------------------|----|--------------------------------------------------------------------------------------------------------------------------------------------------------------------------------------------------------------------------------------|------|----------------------------------------------------------------------------------------------------------------------------------|-----|-----|-----------|-----|
|                    |                                           |    | activity and whey protein (24 g)<br><br>Exercise+protein (EP, n=30): Same exercise program as exercise only group and whey protein (24 g)                                                                                            |      |                                                                                                                                  |     |     |           |     |
| Cronin et al. 2019 | Randomized (2 groups) + partial crossover | 17 | Exercise (n=8 (initial) + 7 crossed over from control): Combined aerobic resistance training program of moderate intensity 3x/wk<br>Aerobic exercise: treadmill, crosstrainer, bike, or stepper (modified Borg RPE, 5 to 7/10) 18-32 | 8 wk | Sedentary males and females, age: 18-40 yr, BMI: 22-35 kg/m <sup>2</sup> , diagnosed with IBD but currently in disease remission | N/A | N/A | No change | N/A |

|  |  |  |                                                                                                                         |  |  |  |  |  |
|--|--|--|-------------------------------------------------------------------------------------------------------------------------|--|--|--|--|--|
|  |  |  | min/session                                                                                                             |  |  |  |  |  |
|  |  |  | Resistance exercise: 7 resistance machine based exercises @ 70% 1RM starting intensity                                  |  |  |  |  |  |
|  |  |  | Control (n=9): usual levels of physical activity, n=7 crossed over to exercise group after completion of control period |  |  |  |  |  |

|                       |          |    |                                                                                                                                                                                                                                                                                             |       |                                                                                                               |           |     |                                                               |     |
|-----------------------|----------|----|---------------------------------------------------------------------------------------------------------------------------------------------------------------------------------------------------------------------------------------------------------------------------------------------|-------|---------------------------------------------------------------------------------------------------------------|-----------|-----|---------------------------------------------------------------|-----|
| Dupuit et al.<br>2022 | 2 groups | 29 | <p>Exercise (n=14):<br/>Concurrent HIIT and resistance training 3x/week, 45 min<br/>HIIT: repeated cycles of sprinting on bike for 8s followed by slow pedaling for 12s</p> <p>Resistance: whole body, 10 exercises, 1-set circuit, with 8–12RM load</p> <p>Control (n=15): No training</p> | 12 wk | Post-menopausal sedentary women with overweight and obesity, BMI: 25-40 kg/m <sup>2</sup> , mean age: 59.9 yr | No change | N/A | Exercise vs. control:<br>Greater change in unweighted Unifrac | N/A |
|-----------------------|----------|----|---------------------------------------------------------------------------------------------------------------------------------------------------------------------------------------------------------------------------------------------------------------------------------------------|-------|---------------------------------------------------------------------------------------------------------------|-----------|-----|---------------------------------------------------------------|-----|

|                     |                          |                              |                                                                                                                                                                                                                                                                                                                               |          |                                                                                                                                                                  |     |           |                                                                                                                                                                                                                                        |     |
|---------------------|--------------------------|------------------------------|-------------------------------------------------------------------------------------------------------------------------------------------------------------------------------------------------------------------------------------------------------------------------------------------------------------------------------|----------|------------------------------------------------------------------------------------------------------------------------------------------------------------------|-----|-----------|----------------------------------------------------------------------------------------------------------------------------------------------------------------------------------------------------------------------------------------|-----|
| Kern et al.<br>2020 | Randomized<br>(4 groups) | 133<br>(original<br>dataset) | Control<br>(n=14*):<br>habitual<br>living<br><br>Bike<br>(n=19*):<br>active<br>commuting<br>by cycling<br>5x/wk<br><br>Mod<br>(n=31*):<br>moderate<br>leisure time<br>exercise @<br>50% VO2<br>Peak 5x/wk<br><br>Vig (n=24*):<br>vigorous<br>leisure time<br>exercise @<br>70% VO2<br>Peak 5x/wk<br><br>*no. of<br>completers | 6<br>mon | Sedentary<br>males and<br>females<br>with<br>overweig<br>ht and<br>obesity,<br>normoten<br>sive, non-<br>diabetic,<br>age: 20–<br>45 yr,<br>BMI: 25–<br>35 kg/m2 | N/A | No change | Vig vs. control:<br>↑ Shannon's<br>index<br><br>All exercise<br>groups vs.<br>control:<br>greater change<br>in Bray-Curtis<br>dissimilarity<br><br>Bike vs.<br>control:<br>greater change<br>in weighted<br>Unifrac over 3<br>mon only | N/A |
|---------------------|--------------------------|------------------------------|-------------------------------------------------------------------------------------------------------------------------------------------------------------------------------------------------------------------------------------------------------------------------------------------------------------------------------|----------|------------------------------------------------------------------------------------------------------------------------------------------------------------------|-----|-----------|----------------------------------------------------------------------------------------------------------------------------------------------------------------------------------------------------------------------------------------|-----|



|                 |                       |    |                                                                                                                                                                                                                                                                                                                   |       |                                                                                                          |     |     |           |                                                                                                                                                                                            |
|-----------------|-----------------------|----|-------------------------------------------------------------------------------------------------------------------------------------------------------------------------------------------------------------------------------------------------------------------------------------------------------------------|-------|----------------------------------------------------------------------------------------------------------|-----|-----|-----------|--------------------------------------------------------------------------------------------------------------------------------------------------------------------------------------------|
| Liu et al. 2020 | Randomized (2 groups) | 42 | <p>Exercise (n=23): High-intensity combined aerobic and resistance training 3x/week for 70 min 10 min intervals each of treadmill, high-intensity resistance and calisthenics exercises , and high-intensity stationary bike with 3-4 min recovery between interval sessions</p> <p>Control (n=19): sedentary</p> | 12 wk | Males with overweight and obesity (BMI>23 kg/m2), age: 20-60 yr, prediabetes or impaired fasting glucose | N/A | N/A | No change | <p>Exercise responders over 12 wk:<br/>         ↓ fecal BCAA, aromatic AA<br/>         ↑ fecal propionate and GABA<br/>         ↑ serum SCFA<br/>         ↓ serum BCAA and aromatic AA</p> |
|-----------------|-----------------------|----|-------------------------------------------------------------------------------------------------------------------------------------------------------------------------------------------------------------------------------------------------------------------------------------------------------------------|-------|----------------------------------------------------------------------------------------------------------|-----|-----|-----------|--------------------------------------------------------------------------------------------------------------------------------------------------------------------------------------------|

|                            |                       |    |                                                                                                                                                                                                       |       |                                                                                           |     |                                                                                                                         |                       |     |
|----------------------------|-----------------------|----|-------------------------------------------------------------------------------------------------------------------------------------------------------------------------------------------------------|-------|-------------------------------------------------------------------------------------------|-----|-------------------------------------------------------------------------------------------------------------------------|-----------------------|-----|
| Mahdiah et al. 2021        | Randomized (2 groups) | 18 | <p>Exercise (n=9): aerobic exercise 3x/week for 30-45 min. Starting intensity @ 55-60% HRR with progression to 70-75%</p> <p>Waitlist control (n=9)</p>                                               | 10 wk | Inactive females with overweight and obesity, BMI: 25-32 kg/m <sup>2</sup> , age:19-30 yr | N/A | <p>Exercise and control over 4 wk:<br/>↑ Lactobacillus</p> <p>Exercise vs. control over 4 wk:<br/>↑ Bifidobacterium</p> | N/A                   | N/A |
| Moitinho-Silva et al. 2021 | Randomized (3 groups) | 42 | <p>Endurance (n=13): 30 min run 3x/week</p> <p>Strength exercise (n=12): whole body hypertrophy strength training 3x/week, 30 min/session</p> <p>Control (n=11): Maintain usual physical activity</p> | 10 wk | Sedentary but healthy males and females, age: 20-45 yr, BMI: 20-35 kg/m <sup>2</sup>      | N/A | N/A                                                                                                                     | Endurance:<br>↓ Chao1 | N/A |

|                         |                       |    |                                                                                                                                                                                                                                                                     |       |                                                                              |     |                                             |     |     |
|-------------------------|-----------------------|----|---------------------------------------------------------------------------------------------------------------------------------------------------------------------------------------------------------------------------------------------------------------------|-------|------------------------------------------------------------------------------|-----|---------------------------------------------|-----|-----|
| Mokhtarzade et al. 2021 | Randomized (2 groups) | 42 | <p>Home based exercise (HBE, n=21): Combined aerobic exercise (3x/wk ) and resistance exercise (2x/wk )</p> <p>Resistance exercise: elastic bands and body weight<br/>Aerobic exercise: 50-75% of HRR</p> <p>Waitlist control (n=21): routine physical activity</p> | 6 mon | Males and females with MS, age: 18-50 yr, expanded disability scale status<5 | N/A | HBE vs. control over 6 mon:<br>↑ Prevotella | N/A | N/A |
|-------------------------|-----------------------|----|---------------------------------------------------------------------------------------------------------------------------------------------------------------------------------------------------------------------------------------------------------------------|-------|------------------------------------------------------------------------------|-----|---------------------------------------------|-----|-----|

|                     |                             |    |                                                                                                                                                                                                                        |       |                                                                                                       |                                                           |                                                                                                                                                                        |           |     |
|---------------------|-----------------------------|----|------------------------------------------------------------------------------------------------------------------------------------------------------------------------------------------------------------------------|-------|-------------------------------------------------------------------------------------------------------|-----------------------------------------------------------|------------------------------------------------------------------------------------------------------------------------------------------------------------------------|-----------|-----|
| Morita et al. 2019  | Non-randomized (two groups) | 32 | <p>Aerobic exercise (AE, n=18): brisk walking 60 min daily @ intensity <math>\geq 3</math> METs</p> <p>Trunk muscle training (TM, n=14): targeted resistance training of trunk muscles 1x/wk for 55-65 min/session</p> | 12 wk | Healthy females, age > 65 yr, median BMI: 21.4 kg/m <sup>2</sup>                                      | N/A                                                       | AE:<br>↑ Bacteroides                                                                                                                                                   | N/A       | N/A |
| Motiani et al. 2020 | Randomized (2 groups)       | 26 | <p>Sprint Interval Training (SIT, n=13): 4-6 30 s cycling bouts/session 3 x/wk</p> <p>Moderate intensity continuous training (MICT, n=13): 40-60 min of</p>                                                            | 2 wk  | Males and females with prediabetes or type 2 diabetes, age: 40-55 yr, BMI: 30.5 ± 3 kg/m <sup>2</sup> | SIT and MICT over 2 wk:<br>↓ F/B ratio<br>↑ Bacteroidetes | <p>SIT and MICT over 2 wk:<br/>↓ Blautia<br/>↓ Clostridium</p> <p>SIT over 2 wk:<br/>↑ Lachnospira</p> <p>MICT over 2 wk:<br/>↑ Veillonella<br/>↑ Faecalibacterium</p> | No change | N/A |

|                        |                          |    |                                                                                                                                                                                                            |          |                                                                              |              |                                                                                                          |           |     |
|------------------------|--------------------------|----|------------------------------------------------------------------------------------------------------------------------------------------------------------------------------------------------------------|----------|------------------------------------------------------------------------------|--------------|----------------------------------------------------------------------------------------------------------|-----------|-----|
|                        |                          |    | cycling @<br>60% VO <sub>2</sub><br>max 3x/wk                                                                                                                                                              |          |                                                                              |              |                                                                                                          |           |     |
| Resende et al.<br>2021 | Randomized<br>(2 groups) | 28 | Exercise<br>(n=14):<br>cycle<br>ergometer<br>3x/wk for 50<br>min/session<br>@ 60-65%<br>VO <sub>2</sub> peak<br><br>Control<br>(n=14):<br>normal<br>lifestyle with<br>no change to<br>physical<br>activity | 10<br>wk | Healthy<br>men, age:<br>20-45 yr,<br>BMI:<br>24.5 ± 3.7<br>kg/m <sup>2</sup> | No<br>change | Exercise vs. control<br>over 10 wk:<br>↑ Streptococcus<br>↓ Unclassified<br>clostridiales order<br>genus | No change | N/A |

|                       |                       |    |                                                                                                                                                                                                                                                                                      |                 |                                                                                     |           |                                                                                                                                                                                                              |            |     |
|-----------------------|-----------------------|----|--------------------------------------------------------------------------------------------------------------------------------------------------------------------------------------------------------------------------------------------------------------------------------------|-----------------|-------------------------------------------------------------------------------------|-----------|--------------------------------------------------------------------------------------------------------------------------------------------------------------------------------------------------------------|------------|-----|
| Sun et al. 2022       | Randomized (3 groups) |    | <p>Low carb diet (LC, n=16): dietary guidance for low carbohydrate diet</p> <p>LC+HIIT (n=17): LC + cycling on cycle ergometer, sprinting for 6s against resistance + 9s rest x 10</p> <p>LC+MICT (n=17): LC + 30 min cycling on cycle ergometer @ 50-60% of VO<sub>2</sub> peak</p> | 4 wk            | Females with overweight and obesity (BMI >23 kg/m <sup>2</sup> ), age: 21.6 ± 3.4 y | No change | <p>LC:<br/>↑ Phascolarctobacterium over 4 wk</p> <p>LC-HIIT:<br/>↓ Bifidobacterium over 4 wk</p> <p>LC-MICT vs. LC at 4 wk:<br/>↑ Blautia<br/>↓ Alistipes</p> <p>LC-HIIT vs. LC at 4 wk:<br/>↓ Alistipes</p> | No changes | N/A |
| Taniguchi et al. 2018 | Randomized crossover  | 33 | Endurance: cycle ergometer 3x/wk. Intensity gradually inc. from 60% - 75% VO <sub>2</sub> peak for 30-45                                                                                                                                                                             | 5 wk each phase | Healthy males, age >60 yr, mean BMI: 22.9 ± 2.5 kg/m <sup>2</sup>                   | No change | Endurance vs. control over 5 wk:<br>↑ Oscillospira                                                                                                                                                           | No change  | N/A |



|                      |                                                        |    |                                                                                                                                                                                                                              |      |                                                                                                      |                                                                                                                  |                                                    |                                                                     |                          |
|----------------------|--------------------------------------------------------|----|------------------------------------------------------------------------------------------------------------------------------------------------------------------------------------------------------------------------------|------|------------------------------------------------------------------------------------------------------|------------------------------------------------------------------------------------------------------------------|----------------------------------------------------|---------------------------------------------------------------------|--------------------------|
|                      |                                                        |    | min/session<br>Control                                                                                                                                                                                                       |      |                                                                                                      |                                                                                                                  |                                                    |                                                                     |                          |
| Torquati et al. 2022 | Randomized (2 groups*)<br>*original study had 3 groups | 32 | Combined aerobic and resistance Moderate intensity continuous training (C-MICT, n=7): 4x/week for 52.5 minutes<br><br>Combined aerobic and resistance High intensity interval training (C-HIIT, n=5): 3x/week for 26 minutes | 8 wk | Male and females with T2D, low activity levels, age: 64.3 ± 6.4 yr, Mean BMI: 34.6 kg/m <sup>2</sup> | C-MICT vs. C-HIIT:<br>↑ Collective abundance of Verrucomicrobia, Actinobacteria, and Desulfobacterota after 8 wk | C-MICT vs. C-HIIT:<br>↑ Bifidobacterium after 8 wk | C-MICT vs. C-HIIT:<br>Differences in Euclidean diversity after 8 wk | No changes in fecal SCFA |

|                     |                       |    |                                                                                                                                                                                                                                                                                                            |       |                                                                                 |           |                                                                                                                                                                 |           |     |
|---------------------|-----------------------|----|------------------------------------------------------------------------------------------------------------------------------------------------------------------------------------------------------------------------------------------------------------------------------------------------------------|-------|---------------------------------------------------------------------------------|-----------|-----------------------------------------------------------------------------------------------------------------------------------------------------------------|-----------|-----|
| Warbeck et al. 2021 | Randomized (2 groups) | 41 | <p>HIIT+ (n=20): HIIT 2x/week, 60 min sessions + group-mediated cognitive-behavioral intervention. HIIT intervals: 30 s of vigorous effort (90% HRmax) followed by 2 min (50% HRmax) of recovery using stationary bikes, ellipticals, treadmills, or BW exercises</p> <p>Wait list control (WLC, n=21)</p> | 12 wk | Inactive males and females with celiac disease, age>18 yr, mean BMI: 27.9 kg/m2 | No change | <p>HIIT+ vs. WLC at 12 wk :</p> <p>↑ Parabacteroides<br/>↑ Defluviitaleaceae_UCG_011</p> <p>WLC vs. HIIT+ at 12 wk:</p> <p>↑ Klebsiella<br/>↑ Adlercreutzia</p> | No change | N/A |
|---------------------|-----------------------|----|------------------------------------------------------------------------------------------------------------------------------------------------------------------------------------------------------------------------------------------------------------------------------------------------------------|-------|---------------------------------------------------------------------------------|-----------|-----------------------------------------------------------------------------------------------------------------------------------------------------------------|-----------|-----|

|                 |                       |    |                                                                                                                                                                                                                                                                                                      |        |                                                                            |                                             |                                                               |                                                                                                                                                                                                         |     |
|-----------------|-----------------------|----|------------------------------------------------------------------------------------------------------------------------------------------------------------------------------------------------------------------------------------------------------------------------------------------------------|--------|----------------------------------------------------------------------------|---------------------------------------------|---------------------------------------------------------------|---------------------------------------------------------------------------------------------------------------------------------------------------------------------------------------------------------|-----|
| Wei et al. 2022 | Randomized (2 groups) | 98 | <p>Standard care (SC, n=34): medical counseling, T2D education, lifestyle advice.</p> <p>Lifestyle (n=64): SC + 5-6 exercise sessions/wk + dietary plan + diet counseling<br/> Exercise: 5-6 aerobic sessions/wk of which 2-3 were combined with resistance training sessions, 30-60 min/session</p> | 12 mon | Males and females with T2D, age $\geq$ 18 yr, BMI: 25-40 kg/m <sup>2</sup> | Lifestyle and SC over 3 and 12 mon:<br>↓F/B | Lifestyle and SC over 12 mon:<br>↑ Bacteroides<br>↑ Roseburia | <p>Lifestyle and SC over 12 mon:<br/>↑ Richness<br/>↑ Shannon's index</p> <p>Lifestyle over 3 mon only:<br/>↑ Shannon's index</p> <p>Lifestyle vs. SC at 3 mon:<br/>Differences in weighted UniFrac</p> | N/A |
|-----------------|-----------------------|----|------------------------------------------------------------------------------------------------------------------------------------------------------------------------------------------------------------------------------------------------------------------------------------------------------|--------|----------------------------------------------------------------------------|---------------------------------------------|---------------------------------------------------------------|---------------------------------------------------------------------------------------------------------------------------------------------------------------------------------------------------------|-----|

|                   |                       |    |                                                                                                                                                                                                   |      |                                                                                                          |                                                                               |                                                                                                                       |           |     |
|-------------------|-----------------------|----|---------------------------------------------------------------------------------------------------------------------------------------------------------------------------------------------------|------|----------------------------------------------------------------------------------------------------------|-------------------------------------------------------------------------------|-----------------------------------------------------------------------------------------------------------------------|-----------|-----|
| Zhong et al. 2020 | Randomized (2 groups) | 14 | Exercise (n=7): combined aerobic and whole body resistance exercise (elastic bands) 4x/wk for 60 min/session<br><br>Control (n=7): maintain daily life and watched health related videos 2x/month | 8 wk | Sedentary females, age: 60-75 yr, mean BMI: 22.96 kg/m <sup>2</sup> HbA1C < 6.5%, fasting BG < 7.0mmol/L | Exercise: ↓Firmicutes<br><br>Control: ↑ Bacteroidetes<br><br>↓ Actinobacteria | Exercise: ↑ Phascolarctobacterium<br>↑ Mitsukella<br><br>Control: ↑ Bacteroides<br>↑ Parabacteroides<br>↓ Eubacterium | No change | N/A |
|-------------------|-----------------------|----|---------------------------------------------------------------------------------------------------------------------------------------------------------------------------------------------------|------|----------------------------------------------------------------------------------------------------------|-------------------------------------------------------------------------------|-----------------------------------------------------------------------------------------------------------------------|-----------|-----|

748  
 749 Results from human studies examining the effects of exercise on the gut microbiome  
 750 **N/A** – not analyzed in study, **No change** – no significant effect of exercise  
 751 ↑ indicates significant increase in response to intervention, ↓ indicates significant decrease in response to intervention  
 752

753  
 754  
 755  
 756 **Table 2.** Characteristics of the studies included in the systematic review examining the effects of exercise intervention on gut  
 757 microbiome outcomes in animal models.  
 758

| Study | Design | Total no. of | Intervention | Duration | Animal model | Phylum | Genus | Diversity | Gut metabolites |
|-------|--------|--------------|--------------|----------|--------------|--------|-------|-----------|-----------------|
|-------|--------|--------------|--------------|----------|--------------|--------|-------|-----------|-----------------|

|                    |                       | subjects |                                                                                                                                                                                                                                                                               |       | profile                                                                                               |                                                                             |                                                                                                                                                                                                                                                                  |                                                                                                                                             |                                                                           |
|--------------------|-----------------------|----------|-------------------------------------------------------------------------------------------------------------------------------------------------------------------------------------------------------------------------------------------------------------------------------|-------|-------------------------------------------------------------------------------------------------------|-----------------------------------------------------------------------------|------------------------------------------------------------------------------------------------------------------------------------------------------------------------------------------------------------------------------------------------------------------|---------------------------------------------------------------------------------------------------------------------------------------------|---------------------------------------------------------------------------|
| Castro et al. 2021 | Randomized (2 groups) | 10       | Exercise (n=5):<br>resistance training<br>3x/week on vertical<br>ladder with 4 series<br>of progressive loads<br>@ 50%, 75%, 90%,<br>100% of MCC<br>(75% of body<br>weight); on<br>completion of 100%<br>load, 30 g added<br>until failure<br><br>Control (n=5):<br>sedentary | 12 wk | Male Wistar<br>Rats, age:<br>45 days,<br>mean body<br>weight:<br>216.5±10.9<br>g; 2-3<br>animlas/cage | N/A                                                                         | Exercise vs. control:<br>↓ Pseudomonas<br>↓ Serratia<br>↓ Comamonas<br>↑ Coprococcus_1                                                                                                                                                                           | Exercise vs.<br>control:<br>↑ Chao1 index<br>after 12 wk<br><br>Exercise vs.<br>control:<br>Altered<br>unweighted<br>unifrac after 12<br>wk | N/A                                                                       |
| Chen et al. 2021   | Randomized (4 groups) | 20       | Control: unrestricted<br>access to run<br><br>20-minute exercise:<br>20 minutes on wheel<br>fatigue tester<br><br>40-minute exercise:<br>40 minutes on wheel<br>fatigue tester<br><br>60-minute exercise:<br>60 minutes on wheel<br>fatigue tester                            | 4 wk  | Female<br>C57BL/6J<br>WT mice,<br>age: 3-4 wk                                                         | Exercise over 4 wk:<br>↑ Bacteroidetes<br>↓ Firmicutes<br>↑ Verrucomicrobia | Exercise vs. control<br>at 4 wk:<br>↑ Akkermansia,<br>Clostridium,<br>Parabacteroides,<br>Christensenella,<br>Dorea, Roseburia,<br>and Paraprevotella<br><br>↓ Anaerotruncus,<br>Jeotgalicoccus,<br>Flexispira, Alistipes,<br>Ruminococcus, and<br>Desulfovibrio | Exercise vs.<br>control at 4 wk:<br>↑ Observed OTUs<br>↑ Shannon's index<br>↓ Simpson's index<br>Different Bray–<br>Curtis<br>dissimilarity | Exercise<br>vs. control<br>at 4 wk:<br>↓ serum D-<br>Lac, LPS,<br>and DAO |

|                        |          |    |                                                                                                                                                                                                                                                                                              |        |                                                                                |                     |                     |                                                                |     |
|------------------------|----------|----|----------------------------------------------------------------------------------------------------------------------------------------------------------------------------------------------------------------------------------------------------------------------------------------------|--------|--------------------------------------------------------------------------------|---------------------|---------------------|----------------------------------------------------------------|-----|
| De Almeida et al. 2016 | 4 groups | 12 | <p>Exercise (n=3): aerobic training @ 60-70% VLT using treadmill and automatic walker alternately 6 days/wk</p> <p>Car (n=3): Exercise + 10 g/day of L-carnitine powder</p> <p>Chr (n=3): Exercise + 10 mg/day of chelated chromium</p> <p>Control (n=3): no exercise or supplementation</p> | 6 wk   | Mangalarga Marchador horses; fillies; 2.5 to 3 yr, mean body mass: 330 ± 30 kg | No changes          | No changes          | Exercise vs. control: Jaccard index differences at end of 6 wk | N/A |
| Giacco et al. 2020     | 4 groups | 20 | <p>Chow-fed controls (n=4)</p> <p>Chow-fed + exercise (n=6): exercise - 5 treadmill runs @ low □ intensity; 2x/day first 2 days, and 1 day on 3rd day for 30 min at 15 m/min with 0° incline</p> <p>Food withdrawal (n=4): food withdrawn for 66 h</p>                                       | 3 days | Male wistar rats; age: 3 mon, mean body weight: 300g,                          | No exercise effects | No exercise effects | No exercise effects                                            | N/A |



|                      |                                           |    |                                                                                                                                                                                                                                                                           |       |                                                                           |                                                                                      |                                                                                                                                                                         |                                                                                |     |
|----------------------|-------------------------------------------|----|---------------------------------------------------------------------------------------------------------------------------------------------------------------------------------------------------------------------------------------------------------------------------|-------|---------------------------------------------------------------------------|--------------------------------------------------------------------------------------|-------------------------------------------------------------------------------------------------------------------------------------------------------------------------|--------------------------------------------------------------------------------|-----|
|                      |                                           |    | Food withdrawal + exercise (n=6)                                                                                                                                                                                                                                          |       |                                                                           |                                                                                      |                                                                                                                                                                         |                                                                                |     |
| Houghton et al. 2018 | Randomization (2 groups). Total 3 groups. | 19 | <p>PolgA mut/mut sedentary (n=5): no exercise training</p> <p>PolgA mut/mut exercise (n=7): progressive increase in treadmill training for 2 mon from 17cm/s for 10 min to 20 cm/s for 40 min/session, 4x/week.</p> <p>PolgA+/+ sedentary (n=7): no exercise training</p> | 7 mon | Wild-type PolgA+/+; PolgA mut/mut mice; mean body mass 29.7 g; age: 4 mon | PolgA mut/mut exercise and sedentary over 7 mon:<br>↑ Firmicutes:Bacteroidetes ratio | <p>PolgA mut/mut exercise over 7 mon:<br/>↑ Bacteroides</p> <p>PolgA mut/mut exercise vs. sedentary at 7 mon post training:<br/>↑ Mucispirillum<br/>↑ Desulfovibrio</p> | PolgA mut/mut exercise vs. sedentary: Differences in Bray-Curtis dissimilarity | N/A |
| Janabi et al. 2017   | Crossover (2 groups)                      | 8  | Graded exercise test (GXT, n=4): Incremental high-speed running on treadmill at a fixed                                                                                                                                                                                   | Acute | Unfit, healthy, Standardbred horses, 4 mares and 4                        | No changes                                                                           | <p>SC<br/>↓ Clostridium (P=0.03)</p> <p>No exercise effects.</p>                                                                                                        | <p>SC<br/>↓ Shannon's index</p> <p>At both the genus and species levels</p>    | N/A |

|                     |          |    |                                                                                                                                                                                             |       |                                                                                 |                                                                                                                                                             |                                                                                                          |                                                                                                                                                                   |     |
|---------------------|----------|----|---------------------------------------------------------------------------------------------------------------------------------------------------------------------------------------------|-------|---------------------------------------------------------------------------------|-------------------------------------------------------------------------------------------------------------------------------------------------------------|----------------------------------------------------------------------------------------------------------|-------------------------------------------------------------------------------------------------------------------------------------------------------------------|-----|
|                     |          |    | 6% grade; initial speed of 4 m/s for 1 min and increased increments of 1 m/s every 60 s until fatigue.<br><br>Parallel standing control (SC, n=4): horses standing in stalls                |       | geldings, 3-8 yr, approx. 500 kg                                                |                                                                                                                                                             |                                                                                                          | the principle coordinate analysis (PCoA) showed significant separation when the samples collected before SC1 were compared to those collected after SC1 (P<0.05). |     |
| Janabis et al. 2016 | 2 groups | 12 | Exercise (n=8): progressive training on 4 days/wk motorised freestall exercise machine and 1 day/wk on treadmill<br><br>Parallel seasonal control (n=4): horses housed in adjacent paddocks | 12 wk | Unfit, healthy, Standardbred horses, 4 mares and 4 geldings, 3-8 yr, 446-517 kg | Exercise: Bacteroidetes ↑ from W0 to W2 and ↓ from W4 to W6<br>Proteobacteria ↑ from W4 to W6 to W8.<br>Spirochaetes ↑ from W2 to W4, and ↓ from W8 to W10. | Exercise: Clostridium ↑ from W0 to W2 and ↓ W2 to W4<br>Dysgonomonas ↑ from W2 to W4 and ↓ from W4 to W6 | Exercise: Shannon diversity (phyla) ↓ W2 and ↑ from W4 to W6                                                                                                      | N/A |

|                              |          |    |                                                                                                                                                                                                                                                                                                                                                  |        |                                            |     |     |            |     |
|------------------------------|----------|----|--------------------------------------------------------------------------------------------------------------------------------------------------------------------------------------------------------------------------------------------------------------------------------------------------------------------------------------------------|--------|--------------------------------------------|-----|-----|------------|-----|
| Lamour<br>eux et<br>al. 2017 | 2 groups | 42 | <p>Voluntary exercise (VE, n=10): 24-h access to wheel running for 8 wk</p> <p>Voluntary non-exercise control (VC, n=10): sedentary</p> <p>Forced exercise (FE, n=10): forced treadmill running 5x/wk for 40 min @ 15m/min-20m/min for 6 wk</p> <p>Forced non-exercise control (FC, n=10): placed in empty cage for same duration as FE mice</p> | 6-8 wk | Male and female C57BL/6 mice; age: 6-10 wk | N/A | N/A | No changes | N/A |
|------------------------------|----------|----|--------------------------------------------------------------------------------------------------------------------------------------------------------------------------------------------------------------------------------------------------------------------------------------------------------------------------------------------------|--------|--------------------------------------------|-----|-----|------------|-----|

|                  |                       |    |                                                                                                                                                                                                                                                                                                                                                                                                                                                                                                                                                                                             |      |                                                                         |                                                                                                                                                                                                                           |                                                                                                                                                                                                                                                                                                                                                                                                                                    |                                                                                                                                                                                                                                                                                                                                                                                                                                                                                                           |     |
|------------------|-----------------------|----|---------------------------------------------------------------------------------------------------------------------------------------------------------------------------------------------------------------------------------------------------------------------------------------------------------------------------------------------------------------------------------------------------------------------------------------------------------------------------------------------------------------------------------------------------------------------------------------------|------|-------------------------------------------------------------------------|---------------------------------------------------------------------------------------------------------------------------------------------------------------------------------------------------------------------------|------------------------------------------------------------------------------------------------------------------------------------------------------------------------------------------------------------------------------------------------------------------------------------------------------------------------------------------------------------------------------------------------------------------------------------|-----------------------------------------------------------------------------------------------------------------------------------------------------------------------------------------------------------------------------------------------------------------------------------------------------------------------------------------------------------------------------------------------------------------------------------------------------------------------------------------------------------|-----|
| Meng et al. 2020 | Randomized (8 groups) | 40 | <p>Control (n=5): room temperature (24°C–26°C ); no exercise</p> <p>Exercise alone (n=5): room temperature; treadmill exercise at speed of 25 m/min and slope of 0° for 1 h on alternate days; two 30 min exercise bouts</p> <p>Acute cold alone(n=5): room temperature; no exercise; cold exposure (3°C–4°C) 4 h before sampling; no exercise</p> <p>Acute cold + Exercise (n=5)</p> <p>Intermittent cold (n=5): daily cold exposure for 4 h</p> <p>Intermittent cold alone (n=5): Cold exposure (3°C–4°C); no exercise</p> <p>Intermittent cold + exercise (n=5): Daily cold exposure</p> | 5 wk | <p>Sprague Dawley rats with obesity, age: 16 wk; on a high-fat diet</p> | <p>Exercise + sustained cold vs. sustained cold alone:<br/> ↑ Proteobacteria (P&lt;0.1)<br/> ↓ Cyanobacteria</p> <p>Exercise + intermittent cold vs. intermittent cold alone:<br/> ↑ Proteobacteria<br/> ↓ Firmicutes</p> | <p>Exercise only vs. control:<br/> ↑ Parabacteroides, Ruminiclostridium 9, Allobaculum, Faecalibaculum, Faecalitalea, Holdemania, Gelria over 5 wk</p> <p>Exercise + cold exposure vs. cold exposure alone:<br/> ↑ Prevotella9, Psychrobacter, Oligella, Jeotgalicoccus, RuminococcaceaeTC G-004, [Eubacterium]halliigroup, Faeklamia, Paenalcaligenes, Holdemania, Paracoccus, Sporosarcina, CandidatusSoleaferre a over 5 wk</p> | <p>Exercise only:<br/> ↑ Shannon’s index over 5 wk</p> <p>Exercise + acute cold:<br/> Shifts in bray-curtis, and unweighted unfrac over 5 wk</p> <p>Exercise + sustained cold:<br/> Shifts in bray-curtis, weighted unfrac, and unweighted unfrac over 5 wk<br/> ↓ Shannon’s index over 5 wk</p> <p>Exercise alone vs. control:<br/> Alterations in bray-curtis, weighted unfrac at 5 wk</p> <p>Exercise + acute cold vs. acute cold only:<br/> Alterations in bray-curtis, unweighted unfrac at 5 wk</p> | N/A |
|------------------|-----------------------|----|---------------------------------------------------------------------------------------------------------------------------------------------------------------------------------------------------------------------------------------------------------------------------------------------------------------------------------------------------------------------------------------------------------------------------------------------------------------------------------------------------------------------------------------------------------------------------------------------|------|-------------------------------------------------------------------------|---------------------------------------------------------------------------------------------------------------------------------------------------------------------------------------------------------------------------|------------------------------------------------------------------------------------------------------------------------------------------------------------------------------------------------------------------------------------------------------------------------------------------------------------------------------------------------------------------------------------------------------------------------------------|-----------------------------------------------------------------------------------------------------------------------------------------------------------------------------------------------------------------------------------------------------------------------------------------------------------------------------------------------------------------------------------------------------------------------------------------------------------------------------------------------------------|-----|



|                     |                       |                                     |                                                                                                                                                                                                                                                                                                                                                                                                                                                                                              |                                               |                                          |            |                                                                                                                     |                      |     |
|---------------------|-----------------------|-------------------------------------|----------------------------------------------------------------------------------------------------------------------------------------------------------------------------------------------------------------------------------------------------------------------------------------------------------------------------------------------------------------------------------------------------------------------------------------------------------------------------------------------|-----------------------------------------------|------------------------------------------|------------|---------------------------------------------------------------------------------------------------------------------|----------------------|-----|
| Mika et al. 2015    | Randomized (2 groups) | 20                                  | <p>Exercise (n=10): voluntary wheel running</p> <p>Control (n=10): sedentary in standard cages</p>                                                                                                                                                                                                                                                                                                                                                                                           | 6 wk exercise + 25 days after running stopped | Male adult Fischer F344 rats, age: 10 wk | No changes | <p>Exercise over 6 wk:</p> <p>↑Rikenellaceae family genera AF12 and an unclassified genus</p> <p>↑ Turicibacter</p> | No changes           | N/A |
| Ribeiro et al. 2019 | Randomized (4 groups) | 40 (only 12 in microbiome analyses) | <p>Standard diet (SD-C, n=10): Standard diet (68.8% carbohydrate, 18.8% protein and 12.4% fat) with no training</p> <p>Standard diet + training, (SD-T, n=10): SD + training on treadmill running at 50% VO2 max, 5x/week, 30 min/session</p> <p>High fat diet (HFD-C, n=10): High fat diet (1.3% carbohydrate, 18.4% protein and 60.3% fat) with no training</p> <p>High fat diet + training (HFD-T, n=10): HFD + training on treadmill running at 50% VO2 max, 5x/week, 30 min/session</p> | 27 wk diet + 8 wk training                    | Male C57BL6 mice; age: 4 wk              | N/A        | <p>SD-T vs. SD-C and HFD-T vs. HFD-C after diet/training period:</p> <p>↑Vagococcus</p> <p>↓Proteus</p>             | No training effects. | N/A |



|                    |                       |    |                                                                                                                                                                                                                                                                                                            |       |                                                                                                                           |                                                    |                                                                                                                                                                                                 |                                                                                    |                                                                                           |
|--------------------|-----------------------|----|------------------------------------------------------------------------------------------------------------------------------------------------------------------------------------------------------------------------------------------------------------------------------------------------------------|-------|---------------------------------------------------------------------------------------------------------------------------|----------------------------------------------------|-------------------------------------------------------------------------------------------------------------------------------------------------------------------------------------------------|------------------------------------------------------------------------------------|-------------------------------------------------------------------------------------------|
| Walshe et al. 2021 | Randomized (2 groups) | 14 | <p>Treatment (n=7): weight loss of 1%/wk; 5-day weekly walk-trot exercise using automated horse walker; 25-40 min/session with increase from W1 to W3.</p> <p>Control (n=7): weight maintenance diet; exercised daily at walk to mimic foraging conditions; total walking time matched treatment group</p> | 6 wk  | Male and female horses, mixed breeds (Standardbred, Cob, Cob pony, and pony), age: 4-17 yr, overweight or obese (BCS>6/9) | No changes                                         | Treatment vs. control:<br>↑ Coprococcus at W6                                                                                                                                                   | Treatment:<br>↑ Fisher alpha index, richness index, and Simpson index over 6 weeks | Treatment vs. control:<br>No differences in fecal metabolomics profiles at any time point |
| Yang et al. 2021   | Randomized (2 groups) | 30 | <p>Exercise (n=15): treadmill running 5x/week, 60 min/day, slope of 0, @40-59% of HRR</p> <p>Control (n=15): no exercise</p>                                                                                                                                                                               | 14 wk | Male C57BL/g mice; pathogen-free; age: 5 wk; body mass: 18 ± 2 g                                                          | Exercise vs. control at 14 wk:<br>↑ Actinobacteria | <p>Exercise vs. control at 14 wk:<br/>↓Bacteroides<br/>↓Parabacteroides<br/>↓Odoribacter</p> <p>Exercise over 14 wk:<br/>↑ Bifidobacteria<br/>↑ Coprococcus<br/>↑ Clostridiales order genus</p> | Exercise vs. control at 14 wk:<br>↓ Chao1 Index                                    | N/A                                                                                       |

759

760

761 Results from animal studies examining the effects of exercise non the gut microbiome

762 N/A – not analyzed in study, **No change** – no significant effect of exercise

763 ↑ indicates significant increase in response to intervention, ↓ indicates significant decrease in response to intervention

764 **Table 3.** Risk-of-bias analysis of studies included in the systematic review examining the effects of exercise interventions on the gut  
 765 microbiome in humans.

| Study                      | Selection of participants free from bias | Study with >80% follow up <sup>1</sup> | Standard/valid/reliable data collection procedures | QCC <sup>2,3</sup> rating |
|----------------------------|------------------------------------------|----------------------------------------|----------------------------------------------------|---------------------------|
| Calabrese et al. 2022      | Yes                                      | No                                     | Yes                                                | ∅                         |
| Cheng et al. 2022          | Yes                                      | No                                     | Yes                                                | ∅                         |
| Cronin et al. 2018         | Yes                                      | Yes                                    | Yes                                                | +                         |
| Cronin et al. 2019         | Yes                                      | No                                     | Yes                                                | ∅                         |
| Dupuit et al. 2022         | Yes                                      | No                                     | Yes                                                | ∅                         |
| Kern et al. 2020           | Yes                                      | No                                     | Yes                                                | ∅                         |
| Liu et al. 2020            | Yes                                      | Yes                                    | Yes                                                | ∅                         |
| Mahdieh et al. 2021        | Yes                                      | Yes                                    | Yes                                                | +                         |
| Moitinho-Silva et al. 2021 | Yes                                      | Yes                                    | Yes                                                | ∅                         |
| Mokhtarzade et al. 2021    | Yes                                      | Yes                                    | Yes                                                | +                         |
| Morita et al. 2019         | No                                       | Yes                                    | Yes                                                | ∅                         |
| Motiani et al. 2020        | Yes                                      | No                                     | Yes                                                | +                         |
| Resende et al. 2021        | Yes                                      | Yes                                    | Yes                                                | +                         |
| Sun et al. 2022            | Yes                                      | No                                     | Yes                                                | ∅                         |
| Taniguchi et al. 2018      | Yes                                      | Yes                                    | Yes                                                | +                         |
| Torquati et al. 2022       | Yes <sup>4</sup>                         | No                                     | Yes                                                | ∅                         |
| Warbeck et al. 2021        | Yes                                      | No                                     | Yes                                                | ∅                         |
| Wei et al. 2022            | Yes                                      | No                                     | Yes                                                | ∅                         |
| Zhong et al. 2021          | Yes                                      | Yes                                    | Yes                                                | +                         |

766 <sup>1</sup> Follow-up here takes into account participant attrition or participants included in analysis.

767 <sup>2</sup> QCC, Quality Criteria Checklist.

768 <sup>3</sup> QCC rating: +, report has clearly addressed issues of inclusion/exclusion, bias, generalizability, and data collection and analysis; ∅,  
 769 report is neither exceptionally strong nor exceptionally weak.

770 <sup>4</sup> Original study

771

772

773 **Table 4.** Risk-of-bias analysis of studies included in the systematic review examining the effects of exercise interventions on the gut  
 774 microbiome in animal models.

| Study                  | Selection of participants free from bias. | Study with >80% follow up <sup>1</sup> | Standard/valid/reliable data collection procedures | QCC rating <sup>2,3</sup> |
|------------------------|-------------------------------------------|----------------------------------------|----------------------------------------------------|---------------------------|
| Castro et al. 2021     | Yes                                       | Yes                                    | Yes                                                | ∅                         |
| Chen et al. 2021       | Yes                                       | Unclear                                | Yes                                                | -                         |
| De Almeida et al. 2016 | Yes                                       | Yes                                    | Yes                                                | +                         |
| Giacco et al. 2020     | Yes                                       | No                                     | Yes                                                | ∅                         |
| Houghton et al. 2018   | Yes                                       | Unclear                                | Yes                                                | ∅                         |
| Janabi et al. 2017     | Yes                                       | Yes                                    | Yes                                                | ∅                         |
| Janabis et al. 2016    | Yes                                       | Yes                                    | Yes                                                | ∅                         |
| Lamoureux et al. 2017  | Yes                                       | Unclear                                | Yes                                                | ∅                         |
| Meng et al. 2020       | Yes                                       | Yes                                    | Yes                                                | ∅                         |
| Mika et al. 2015       | Yes                                       | No                                     | Yes                                                | ∅                         |
| Ribeiro et al. 2019    | Yes                                       | No                                     | Yes                                                | ∅                         |
| Walshe et al. 2021     | No <sup>4</sup>                           | Yes                                    | Yes                                                | ∅                         |
| Yang et al. 2021       | Yes                                       | Unclear                                | Yes                                                | ∅                         |

775 <sup>1</sup> Follow-up here takes into account participant attrition or participants included in analysis.

776 <sup>2</sup> QCC, Quality Criteria Checklist.

777 <sup>3</sup> QCC rating: +, report has clearly addressed issues of inclusion/exclusion, bias, generalizability, and data collection and analysis; -,  
 778 report has not addressed these issues adequately; and ∅, report is neither exceptionally strong nor exceptionally weak.

779 <sup>4</sup> Client-owned, not experimental animals
